# Supplementary material for: Worldwide comparison of survival from childhood leukaemia for 1995–2009, by subtype, age, and sex (CONCORD-2): a population-based study of individual data for 89 828 children from 198 registries in 53 countries
Source: PubMed Central journal article supplement (PMC5418564; doi:10.1016/s2352-3026(17)30052-2), 2017-04-11
Supplement: mmc1.pdf [file mmc1.pdf]

# THE LANCET

## Haematology

### Supplementary appendix

This appendix formed part of the original submission and has been peer reviewed. We post it as supplied by the authors.

Supplement to: Bonaventure A, Harewood R, Stiller CA, et al, and the CONCORD Working Group. Worldwide comparison of survival from childhood leukaemia for 1995–2009, by subtype, age, and sex (CONCORD-2): a population-based study of data including 89 828 children from 198 registries in 53 countries. *Lancet Haematol* 2017; published online April 11. [http://dx.doi.org/10.1016/S2352-3026\(17\)30052-2](http://dx.doi.org/10.1016/S2352-3026(17)30052-2).

This supplementary appendix has been corrected. The corrected version first appeared at [thelancet.com/haematology](http://thelancet.com/haematology) on April 28, 2017.

**Supplementary appendix to:**

**Worldwide comparison of survival from childhood leukaemia 1995-2009, by subtype, age, and sex (CONCORD-2): a population-based study of individual data for 89 828 children from 198 registries in 53 countries**

Bonaventure A, Harewood R, Stiller CA, Gatta G, Clavel J, Stefan DC, Carreira H, Spika D, Marcos-Gragera R, Peris-Bonet R, Piñeros M, Sant M, Kuehni CE, Murphy MFG, Coleman MP, Allemani C, and the CONCORD Working Group

|                                                                                                                                                                                                                                                                                              |     |
|----------------------------------------------------------------------------------------------------------------------------------------------------------------------------------------------------------------------------------------------------------------------------------------------|-----|
| <b>CONCORD Working Group</b>                                                                                                                                                                                                                                                                 | p2  |
| <b>Web-table 1:</b> Definition of leukaemia sub-types, based on morphology codes from the International Classification of Diseases for Oncology, third edition (ICD-O-3) <sup>1</sup> , with groupings from the International Classification of Childhood Cancer, third edition <sup>2</sup> | p5  |
| <b>Web-table 2:</b> Precursor-cell lymphoid leukaemia (ICCC-3 Ia1) - Five-year net survival (NS, %) by age group and sex: continent, country and calendar period of diagnosis                                                                                                                | p6  |
| <b>Web-table 3:</b> Acute myeloid leukaemia (ICCC-3 Ib) - Five-year net survival (NS, %) by age group and sex: continent, country and calendar period of diagnosis                                                                                                                           | p15 |

## **CONCORD Working Group**

**Africa**—**Algeria**: S Bouzbid (Registre du Cancer d'Annaba); M Hamdi-Chérif\*, Z Zaidi (Registre du Cancer de Sétif); **Gambia**: E Bah, R Swaminathan (National Cancer Registry); **Lesotho**: SH Nortje (Children's Haematology Oncology Clinics - Lesotho); **Libya**: MM El Mistiri (Benghazi Cancer Registry); **Mali**: S Bayo, B Malle (Kankou Moussa University); **Mauritius**: SS Manraj, R Sewpaul-Sungkur (Mauritius Cancer Registry); **Nigeria**: A Fabowale, OJ Ogunbiyi\* (Ibadan Cancer Registry); **South Africa**: D Bradshaw, NIM Somdyala (Eastern Cape Province Cancer Registry); DC Stefan (Umtata University); **Sudan**: M Abdel-Rahman (University of Khartoum); **Tunisia**: L Jaidane, M Mokni (Registre du Cancer du Centre Tunisien).

**America (Central and South)**—**Argentina**: I Kumcher, F Moreno (National Childhood Cancer Registry – National Cancer Institute); MS González, EA Laura (Registro Regional de Tumores del Sur de la Provincia de Buenos Aires); SB Espinola, GH Calabrano (Registro Poblacional de Tumores de la Provincia del Chubut); B Carballo Quintero, R Fita (Registro Provincial de Tumores de Córdoba); DA Garcilazo, PL Giacciani (Entre Rios Cancer Registry); MC Diumenjo, WD Laspada (Registro Provincial de Tumores de Mendoza); MA Green, MF Lanza (Registro de Cáncer de Santa Fe); SG Ibañez (Cancer Registry of Tierra del Fuego Province); **Brazil**: CA Lima, E Lobo de Oliveira (Registro de Câncer de Base Populacional de Aracaju); C Daniel, C Scanduzzi (Cancer Registry of Distrito Federal); PCF De Souza, CD Melo (Registro de Câncer de Base Populacional de Cuiabá); K Del Pino, C Laporte (Registro de Curitiba); MP Curado, JC de Oliveira (Registro de Goiânia); CLA Veneziano, DB Veneziano (Registro de Câncer de Base Populacional de Jahu); MRDO Latorre, LF Tanaka (Registro de Câncer de São Paulo); G Azevedo e Silva\* (University of Rio de Janeiro); **Chile**: JC Galaz, JA Moya (Registro Poblacional de Câncer Region de Antofagasta); DA Herrmann, S Vargas (Registro Poblacional Region de Los Rios); **Colombia**: VM Herrera, CJ Uribe (Registro Poblacional de Câncer Area Metropolitana de Bucaramanga); LE Bravo (Cali Cancer Registry); NE Arias-Ortiz (Registro Poblacional de Câncer de Manizales); DM Jurado, MC Yépez (Registro Poblacional de Câncer del Municipio de Pasto); **Cuba**: YH Galán, P Torres (Registro Nacional de Câncer de Cuba); **Ecuador**: F Martínez-Reyes, ML Pérez-Meza (Cuenca Tumor Registry); L Jaramillo, R Quinto (Guayaquil Cancer Registry); P Cueva, JG Yépez (Quito Cancer Registry); **Puerto Rico**: CR Torres-Cintrón, G Tortolero-Luna (Puerto Rico Central Cancer Registry); **Uruguay**: R Alonso, E Barrios (Registro Nacional de Câncer).

**America (North)**—**Canada**: C Nikiforuk, L Shack (Alberta Cancer Registry); AJ Coldman, RR Woods (British Columbia Cancer Registry); G Noonan, D Turner\* (Manitoba Cancer Registry); E Kumar, B Zhang (New Brunswick Provincial Cancer Registry); FR McCrate, S Ryan (Newfoundland and Labrador Cancer Registry); H Hannah (Northwest Territories Cancer Registry); RAD Dewar, M MacIntyre (Nova Scotia Surveillance and Epidemiology Unit); A Lalany, M Ruta (Nunavut Department of Health and Social Services); L Marrett, DE Nishri\* (Ontario Cancer Registry); C McClure, KA Vriends (Prince Edward Island Cancer Registry); C Bertrand, R Louchini (Registre Québécois du Cancer); KI Robb, H Stuart-Panko (Saskatchewan Cancer Registry); S Demers, S Wright (Yukon Government); **USA**: JT George, X Shen (Alabama Statewide Cancer Registry); JT Brockhouse, DK O'Brien (Alaska Cancer Registry); KC Ward (Georgia Comprehensive Cancer Registry; Metropolitan Atlanta Registry); L Almon (Metropolitan Atlanta Registry); J Bates (California State Cancer Registry); R Rycroft (Colorado Central Cancer Registry); L Mueller, C Phillips (Connecticut Tumor Registry); H Brown, B Cromartie (Delaware Cancer Registry); AG Schwartz, F Vigneau (Metropolitan Detroit Cancer Surveillance System); JA MacKinnon, B Wohler (Florida Cancer Data System); AR Bayakly (Georgia Comprehensive Cancer Registry); CA Clarke, SL Glaser (Greater Bay Area Cancer Registry); D West (Cancer Registry of Greater California); MD Green, BY Hernandez (Hawaii Tumor Registry); CJ Johnson, D Jozwik (Cancer Data Registry of Idaho); ME Charlton, CF Lynch (State Health Registry of Iowa); B Huang, TC Tucker\* (Kentucky Cancer Registry); D Deapen, L Liu (Los Angeles Cancer Surveillance Program); MC Hsieh, XC Wu (Louisiana Tumor Registry); K Stern (Maryland Cancer Registry); ST Gershman, RC Knowlton (Massachusetts Cancer Registry); J Alverson, GE Copeland (Michigan State Cancer Surveillance Program); DB Rogers (Mississippi Cancer Registry); D Lemons, LL Williamson (Montana Central Tumor Registry); M Hood (Nebraska Cancer Registry); GM Hosain, JR Rees (New Hampshire State Cancer Registry); KS Pawlish, A Stroup (New Jersey State Cancer Registry); C Key, C Wiggins (New Mexico Tumor Registry); AR Kahn, MJ Schymura (New York State Cancer Registry); G Leung, C Rao (North Carolina Central Cancer Registry); L Giljahn, B Warther (Ohio Cancer Incidence Surveillance System); A Pate (Oklahoma Central Cancer Registry); M Patil, SS Schubert (Oregon State Cancer Registry); JJ Rubertone, SJ Slack (Pennsylvania Cancer Registry); JP Fulton, DL Rousseau (Rhode Island Cancer Registry); TA Janes, SM Schwartz (Seattle Cancer Surveillance System); SW Bolick, DM Hurley (South Carolina Central Cancer Registry); J Richards, MA Whiteside (Tennessee Cancer Registry); LM Nogueira (Texas Cancer Registry); K Herget, C Sweeney (Utah Cancer Registry); J Martin, S Wang (Virginia Cancer Registry); DG Harrelson, MB Keitheri Cheteri (Washington State Cancer Registry); S Farley, AG Hudson (West Virginia Cancer Registry); R Borchers, L Stephenson (Wisconsin Department of Health Services); JR

Espinoza (Wyoming Cancer Surveillance Program); HK Weir\* (Centers for Disease Control and Prevention); BK Edwards\* (National Cancer Institute).

**Asia—China:** N Wang, L Yang (Beijing Cancer Registry); JS Chen (Changle City Cancer Registry); GH Song (Cixian Cancer Registry); XP Gu (Dafeng County Center for Disease Control and Prevention); P Zhang (Dalian Centers for Disease Prevention and Control); HM Ge (Donghai County Center for Disease Prevention and Control); DL Zhao (Feicheng County); JH Zhang (Ganyu Center for Disease Prevention and Control); FD Zhu (Guanyun Cancer Registry); JG Tang (Haimen Cancer Registry); Y Shen (Haining City Cancer Registry); J Wang (Jianhu Cancer Registry); QL Li (Jiashan County Cancer Registry); XP Yang (Jintan Cancer Registry); J Dong, W Li (Lianyungang Center for Disease Prevention and Control); LP Cheng (Henan Province Central Cancer Registry); JG Chen (Qidong County Cancer Registry); QH Huang (Sihui Cancer Registry); SQ Huang (Taixing Cancer Registry); GP Guo (Cancer Institute of Yangzhong City); K Wei (Zhongshan City Cancer Registry); WQ Chen\*, H Zeng (National Central Cancer Registry China); **Cyprus:** AV Demetriou, P Pavlou (Cyprus Cancer Registry); **Hong Kong:** WK Mang, KC Ngan (Hong Kong Cancer Registry); **India:** R Swaminathan (Chennai Cancer Registry); AC Katak, M Krishnatreya (Guwahati Cancer Registry); PA Jayalekshmi, P Sebastian (Karunagappally Cancer Registry); SD Sapkota, Y Verma (Population Based Cancer Registry, Sikkim); A Nandakumar\* (National Centre for Disease Informatics and Research; National Cancer Registry Programme); **Indonesia:** E Suzanna (Jakarta Cancer Registry); **Israel:** L Keinan-Boker, BG Silverman (Israel National Cancer Registry); **Japan:** H Ito, H Nakagawa (Aichi Cancer Registry); M Hattori, Y Kaizaki (Fukui Cancer Registry); H Sugiyama, M Utada (Hiroshima Prefecture Cancer Registry); K Katayama, H Narimatsu (Kanagawa Cancer Registry); S Kanemura (Miyagi Prefectural Cancer Registry); T Koike (Niigata Prefecture Cancer Registry); I Miyashiro (Osaka Cancer Registry); M Yoshii (Saga Prefectural Cancer Registry); I Oki (Tochigi Prefectural Cancer Registry); A Shibata (Yamagata Cancer Registry); T Matsuda\* (National Cancer Center); **Jordan:** O Nimri (Jordan National Cancer Registry); **Malaysia:** A Ab Manan (Penang Cancer Registry); N Bhoo-Pathy (University of Malaya); **Mongolia:** S Tuvshingerel (Cancer Registry of Mongolia); O Chimedsuren (Mongolian National University of Medical Sciences – MNUMS); **Qatar:** AHM Al Khater, MM El Mistiri (Qatar Cancer Registry); **Saudi Arabia:** H Al-Eid (Saudi National Cancer Registry); **South Korea:** KW Jung, YJ Won (Korea Central Cancer Registry); **Taiwan:** CJ Chiang, MS Lai (Taiwan Cancer Registry); **Thailand:** K Suwanrungruang, S Wiangnon (Khon Kaen Provincial Registry); K Daoprasert, D Pongnikorn (Lampang Cancer Registry); SL Geater, H Sriplung (Songkhla Cancer Registry); **Turkey:** S Eser, CI Yakut (Izmir Cancer Registry).

**Europe—Austria:** M Hackl (Austrian National Cancer Registry); H Mühlböck, W Oberaigner (Tyrol Cancer Registry); **Belarus:** AA Zborovskaya (Belarus Childhood Cancer Subregistry); OV Aleinikova (Belarusian Research Center for Pediatric Oncology, Hematology and Immunology); **Belgium:** K Henau, L Van Eycken (Belgian Cancer Registry); **Bulgaria:** N Dimitrova, Z Valerianova (Bulgarian National Cancer Registry); **Croatia:** M Šekerija (Croatian National Cancer Registry); **Czech Republic:** M Zvolský (Czech National Cancer Registry); **Denmark:** G Engholm, H Storm\* (Danish Cancer Society); **Estonia:** K Innos, M Mägi (Estonian Cancer Registry); **Finland:** N Malila, K Seppä (Cancer Society of Finland); **France:** J Jégu, M Velten (Bas-Rhin General Cancer Registry); E Cornet, X Troussard (Registre Régional des Hémopathies Malignes de Basse Normandie); AM Bouvier, J Faivre (Burgundy Digestive Cancer Registry); AV Guizard (Calvados General Cancer Registry); V Bouvier, G Launoy (Calvados Digestive Cancer Registry); P Arveux (Côte-d'Or Gynaecologic Cancer Registry); M Maynadié, M Mounier (Côte-d'Or Haematopoietic Malignancies Registry); E Fournier, AS Woronoff (Doubs and Belfort Territory General Cancer Registry); M Daoulas (Finistère Cancer Registry); J Clavel (National Registry of Childhood Haematopoietic Malignancies); S Le Guyader-Peyrou, A Monnereau (Gironde Haematopoietic Malignancies Registry); B Trétarre (Hérault General Cancer Registry); M Colonna (Isère General Cancer Registry); A Cowppli-Bony, F Molinié (Loire-Atlantique-Vendée Cancer Registry); S Bara, D Degré (Manche General Cancer Registry); O Ganry, B Lapôte-Ledoux (Somme General Cancer Registry); P Grosclaude (Tarn General Cancer Registry); J Estève (Hospices Civils de Lyon); F Bray\*, M Piñeros\* (International Agency for Research on Cancer); F Sassi (Organisation for Economic Co-operation and Development); **Germany:** R Stabenow (Common Cancer Registry of the Federal States); A Eberle (Bremen Cancer Registry); C Erb, A Nennecke (Hamburg Cancer Registry); J Kieschke, E Sirri (Epidemiological Cancer Registry of Lower Saxony); H Kajueter (North Rhine Westphalia Cancer Registry); K Emrich, SR Zeissig (Rhineland Palatinate Cancer Registry); B Holleczeck (Saarland Cancer Registry); N Eisemann, A Katalinic (Schleswig-Holstein Cancer Registry); H Brenner (German Cancer Research Center); **Gibraltar:** RA Asquez, V Kumar (Gibraltar Cancer Registry); **Iceland:** EJ Ólafsdóttir, L Tryggvadóttir (Icelandic Cancer Registry); **Ireland:** H Comber, PM Walsh (National Cancer Registry); H Sundseth\* (European Institute of Women's Health); **Italy:** E Devigili, G Mazzoleni (Registro Tumori Alto Adige); A Giacomini (Registro Tumori Biella); F Bella, M Castaing (Integrated Cancer Registry of Catania-Messina-Siracusa-Enna); A Suter (Registro Tumori Catanzaro); G Gola (Registro Tumori della Provincia di Como); S Ferretti (Registro Tumori della Provincia di Ferrara); D Serraino, A Zucchetto (Registro Tumori del Friuli Venezia Giulia); R Lillini, M Vercelli (Registro Tumori Regione Liguria); S Busco, F Pannozzo (Registro Tumori della Provincia di Latina); S Vitarelli (Registro Tumori

della Provincia di Macerata); P Ricci (Registro Tumori Mantova); C Pascucci (Registro Tumori Marche Childhood); M Autelitano (Registro Tumori Milano); C Cirilli, M Federico (Registro Tumori della Provincia di Modena); M Fusco, MF Vitale (Registro Tumori della ASL Napoli 3 sud); M Usala (Nuoro Cancer Registry); R Cusimano, W Mazzucco (Registro Tumori di Palermo e Provincia); M Michiara, P Sgargi (Registro Tumori della Provincia di Parma); MM Maule, C Sacerdote (Piedmont Childhood Cancer Registry); R Tumino (Registro Tumori della Provincia di Ragusa); E Di Felice, M Vicentini (Registro Tumori Reggio Emilia); F Falcini (Registro Tumori della Romagna); L Cremonese (Registro Tumori Salerno); M Budroni, R Cesaraccio (Registro Tumori della Provincia di Sassari); ML Contrino, F Tisano (Registro Tumori Siracusa); AC Fanetti, S Maspero (Registro Tumori della Provincia di Sondrio); G Candela, T Scuderi (Registro Tumori Trapani); MA Gentilini, S Piffer (Registro Tumori Trento); S Rosso, L Sacchetto (Registro Tumori Piemonte Città di Torino); A Caldarella (Registro Tumori della Regione Toscana); F La Rosa, F Stracci (Registro Tumori Umbro di Popolazione); P Contiero, G Tagliabue (Registro Tumori Lombardia, Provincia di Varese); AP Dei Tos, M Zorzi (Registro Tumori Veneto); R Zanetti\* (International Association of Cancer Registries); P Baili, F Berrino\*, G Gatta, M Sant\* (Fondazione IRCCS Istituto Nazionale dei Tumori); R Capocaccia\*, R De Angelis (National Centre for Epidemiology); **Latvia**: E Liepina, A Maurina (Latvian Cancer Registry); **Lithuania**: G Smailyte (Lithuanian Cancer Registry); **Malta**: D Agius, N Calleja (Malta National Cancer Registry); **Netherlands**: S Siesling, O Visser (Comprehensive Cancer Centre of the Netherlands); **Norway**: S Larønningen, B Møller (The Cancer Registry of Norway); **Poland**: A Dyzmann-Sroka, M Trojanowski (Greater Poland Cancer Registry); S Góźdź, R Mężyk (Cancer Registry of Kielce); M Grądalska-Lampart, AU Radziszewska (Podkarpackie Cancer Registry); JA Didkowska, U Wojciechowska (National Cancer Registry); J Błaszczuk, K Kępska (Lower Silesian Cancer Registry); M Bielska-Lasota, K Kwiatkowska (National Institute of Public Health - NIH); **Portugal**: G Forjaz, RA Rego (Registo Oncológico Regional dos Açores); J Bastos, MA Silva (Registo Oncológico Regional do Centro); L Antunes, MJ Bento (Registo Oncológico Regional do Norte); A Mayer-da-Silva, A Miranda (Registo Oncológico Regional do Sul); **Romania**: D Coza, AI Todescu (Cancer Institute I. Chiricuta); **Russian Federation**: MY Valkov (Arkhangelsk Regional Cancer Registry); **Slovakia**: J Adamcik, C Safaei Diba (National Cancer Registry of Slovakia); **Slovenia**: M Primic-Žakelj, T Žagar (Cancer Registry of Republic of Slovenia); J Stare (University of Ljubljana); **Spain**: E Almar, A Mateos (Registro de Cáncer de Albacete); JR Quirós (Registro de Tumores del Principado de Asturias); J Bidaurrezaga, N Larrañaga (Basque Country Cancer Registry); JM Díaz García, AI Marcos (Registro de Cáncer de Cuenca); R Marcos-Gragera, ML Vilardell Gil (Registre de Càncer de Girona); E Molina, MJ Sánchez (Registro de Cáncer de Granada); P Franch Sureda, M Ramos Montserrat (Mallorca Cancer Registry); MD Chirlaque, C Navarro (Murcia Cancer Registry); EE Ardanaz, CC Moreno-Iribas (Registro de Cáncer de Navarra); R Fernández-Delgado, R Peris-Bonet (Registro Español de Tumores Infantiles (RETI-SEHOP)); J Galceran (Tarragona Cancer Registry); **Sweden**: S Khan, M Lambe (Swedish Cancer Registry); **Switzerland**: B Camey (Registre Fribourgeois des Tumeurs); C Bouchardy, M Usel (Geneva Cancer Registry); SM Ess (Cancer Registry Grisons and Glarus); C Herrmann (Cancer Registry Grisons and Glarus; Cancer Registry of St Gallen-Appenzell); JL Bulliard, M Maspoli-Conconi (Registre Neuchâtelois des Tumeurs); H Frick (Cancer Registry of St Gallen-Appenzell); CE Kuehni, M Schindler (Swiss Childhood Cancer Registry); A Bordoni, A Spitale (Registro Tumori Cantone Ticino); A Chioleri, I Konzelmann (Registre Valaisan des Tumeurs); SI Dehler, KL Matthes (Krebsregister der Kantone Zürich und Zug); **United Kingdom**: J Rashbass, CA Stiller\* (Public Health England); D Fitzpatrick, A Gavin (Northern Ireland Cancer Registry); F Bannon (Queens University, Belfast); RJ Black, DH Brewster (Scottish Cancer Registry); DW Huws, C White (Welsh Cancer Intelligence & Surveillance Unit); P Finan (Leeds General Infirmary); C Allemani\*, A Bonaventure, H Carreira, MP Coleman\*, V Di Carlo, R Harewood, K Liu, M Matz, L Montel, M Nikšić, B Racht\*, N Sanz, D Spika (London School of Hygiene & Tropical Medicine); R Stephens\* (National Cancer Research Institute, London); M Peake (University of Leicester), MFG Murphy (University of Oxford).

**Oceania**—**Australia**: E Chalker, L Newman (Australian Capital Territory Cancer Registry); D Baker, MJ Soeberg (NSW Cancer Registry); J Aitken, C Scott (Queensland Cancer Registry); BC Stokes, A Venn (Tasmanian Cancer Registry); H Farrugia, GG Giles (Victorian Cancer Registry); T Threlfall (Western Australian Cancer Registry); D Currow\*, H You (Cancer Institute NSW); **New Zealand**: J Hendrix, C Lewis (New Zealand Cancer Registry).

\*CONCORD Steering Committee

## Web-table 1

Definition of leukaemia sub-types, based on morphology codes from the International Classification of Diseases for Oncology, third edition (ICD-O-3)<sup>1</sup>, with groupings from the International Classification of Childhood Cancer, third edition<sup>2</sup>

| ICD-O-3 morphology code                                      | Label (main title)                                              | ICCC-3 subgroup (if any)  |
|--------------------------------------------------------------|-----------------------------------------------------------------|---------------------------|
| <b>Lymphoid leukaemias (group Ia)</b>                        |                                                                 |                           |
| 9835                                                         | Precursor cell lymphoblastic leukaemia, NOS                     | Precursor-cell            |
| 9836                                                         | Precursor B-cell lymphoblastic leukaemia                        | Precursor-cell            |
| 9837                                                         | Precursor T-cell lymphoblastic leukaemia                        | Precursor-cell            |
| 9823                                                         | B-cell chronic lymphocytic leukaemia/small lymphocytic lymphoma | Mature B-cell             |
| 9826                                                         | Burkitt cell leukaemia                                          | Mature B-cell             |
| 9832                                                         | Prolymphocytic leukaemia, NOS                                   | Mature B-cell             |
| 9833                                                         | Prolymphocytic leukaemia, B-cell type                           | Mature B-cell             |
| 9940                                                         | Hairy cell leukaemia                                            | Mature B-cell             |
| 9827                                                         | Adult T-cell leukaemia/lymphoma (HTLV-1 positive)               | Mature T-cell and NK cell |
| 9831                                                         | T-cell large granular lymphocytic leukaemia                     | Mature T-cell and NK cell |
| 9834                                                         | Prolymphocytic leukaemia, T-cell type                           | Mature T-cell and NK cell |
| 9948                                                         | Aggressive NK-cell leukaemia                                    | Mature T-cell and NK cell |
| 9820                                                         | Lymphoid leukaemia, NOS                                         | Lymphoid leukaemia, NOS   |
| <b>Acute myeloid leukaemias (group Ib)</b>                   |                                                                 |                           |
| 9840                                                         | Acute myeloid leukaemia, M6 type                                |                           |
| 9861                                                         | Acute myeloid leukaemia, NOS                                    |                           |
| 9866                                                         | Acute promyelocytic leukaemia, t(15;17) (q22;q11-12)            |                           |
| 9867                                                         | Acute myelomonocytic leukaemia                                  |                           |
| 9870                                                         | Acute basophilic leukaemia                                      |                           |
| 9871                                                         | Acute myeloid leukaemia with abnormal marrow eosinophils        |                           |
| 9872                                                         | Acute myeloid leukaemia, minimal differentiation                |                           |
| 9873                                                         | Acute myeloid leukaemia without maturation                      |                           |
| 9874                                                         | Acute myeloid leukaemia with maturation                         |                           |
| 9891                                                         | Acute monocytic leukaemia                                       |                           |
| 9895                                                         | Acute myeloid leukaemia with multilineage dysplasia             |                           |
| 9896                                                         | Acute myeloid leukaemia, t(8;21)(q22;q22)                       |                           |
| 9897                                                         | Acute myeloid leukaemia, 11q23 abnormalities                    |                           |
| 9910                                                         | Acute megakaryoblastic leukaemia                                |                           |
| 9920                                                         | Therapy-related acute myeloid leukaemia, NOS                    |                           |
| 9931                                                         | Acute panmyelosis with myelofibrosis                            |                           |
| <b>Unspecified and other specified leukaemias (group Ie)</b> |                                                                 |                           |
| 9800                                                         | Leukaemia, NOS                                                  |                           |
| 9801                                                         | Acute leukaemia, NOS                                            |                           |
| 9805                                                         | Acute biphenotypic leukaemia                                    |                           |
| 9860                                                         | Myeloid leukaemia, NOS                                          |                           |
| 9930                                                         | Myeloid sarcoma                                                 |                           |

## References

1. Fritz AG, Percy C, Jack A, Shanmugaratnam K, Sobin LH, Parkin DM, Whelan SL, editors. International Classification of Diseases for Oncology (ICD-O). 3rd ed. Geneva: World Health Organization; 2000.
2. Steliarova-Foucher E, Stiller C, Lacour B, Kaatsch P. International Classification of Childhood Cancer, third edition. *Cancer* 2005; **103**: 1457-67.

## **Web-table 2**

### **Precursor-cell lymphoid leukaemia (ICCC-3 Ia1) - Five-year net survival (NS, %) by age group and sex: continent, country and calendar period of diagnosis**

Net survival estimates by sex were age-standardised where possible. Estimates in italics are not age-standardised

\* National coverage – the data are derived from a population-based cancer registry (registries) covering the entire country

<sup>M</sup> Estimate based on merging data for 2 (or all 3) calendar periods

<sup>R</sup> Age-standardised estimate computed by pooling two age-specific estimates and re-estimation

<sup>§</sup> Estimate judged as less reliable

<sup>‡</sup> Korea: Republic of Korea; Russia: Russian Federation

Web-table 2: Precursor-cell lymphoid leukaemia (ICCC3 Ia1) - Five-year net survival (NS, %) by age group and sex: continent, country and calendar period of diagnosis

| Calendar                           | Age group (years) |      |             |     |      |             |     |                   |             |       |      |             | Sex  |                   |             |       |                   |             |
|------------------------------------|-------------------|------|-------------|-----|------|-------------|-----|-------------------|-------------|-------|------|-------------|------|-------------------|-------------|-------|-------------------|-------------|
|                                    | <1                |      |             | 1-4 |      |             | 5-9 |                   |             | 10-14 |      |             | Boys |                   |             | Girls |                   |             |
|                                    | N                 | NS % | 95% CI      | N   | NS % | 95% CI      | N   | NS %              | 95% CI      | N     | NS % | 95% CI      | N    | NS %              | 95% CI      | N     | NS %              | 95% CI      |
| <b>AFRICA</b>                      |                   |      |             |     |      |             |     |                   |             |       |      |             |      |                   |             |       |                   |             |
| Algerian registries                |                   |      |             |     |      |             |     |                   |             |       |      |             |      |                   |             |       |                   |             |
| 2000-2004                          | 1                 |      |             | 3   |      |             | 6   |                   |             | 9     |      |             | 11   | 56.5 <sup>§</sup> | 25.6 - 87.3 | 8     |                   |             |
| 2005-2009                          |                   |      |             | 7   |      |             | 5   |                   |             | 5     |      |             | 9    |                   |             | 8     |                   |             |
| Lesotho *                          |                   |      |             |     |      |             |     |                   |             |       |      |             |      |                   |             |       |                   |             |
| 1995-2009                          |                   |      |             | 5   |      |             | 13  | 25.3 <sup>M</sup> | 0.7 - 49.9  | 4     |      |             | 13   | 43.6 <sup>M</sup> | 14.8 - 72.3 | 9     |                   |             |
| Libya (Benghazi)                   |                   |      |             |     |      |             |     |                   |             |       |      |             |      |                   |             |       |                   |             |
| 2003-2004                          |                   |      |             | 8   |      |             | 4   |                   |             | 2     |      |             | 7    |                   |             | 7     |                   |             |
| Tunisia (Central)                  |                   |      |             |     |      |             |     |                   |             |       |      |             |      |                   |             |       |                   |             |
| 1996-1999                          |                   |      |             | 9   |      |             | 7   |                   |             | 4     |      |             | 15   | 53.4 <sup>§</sup> | 16.2 - 90.7 | 5     |                   |             |
| 2000-2004                          |                   |      |             | 2   |      |             | 3   |                   |             | 1     |      |             | 3    |                   |             | 3     |                   |             |
| 2005-2007                          |                   |      |             | 2   |      |             | 2   |                   |             | 5     |      |             | 8    |                   |             | 1     |                   |             |
| <b>AMERICA (Central and South)</b> |                   |      |             |     |      |             |     |                   |             |       |      |             |      |                   |             |       |                   |             |
| Argentina *                        |                   |      |             |     |      |             |     |                   |             |       |      |             |      |                   |             |       |                   |             |
| 2000-2004                          | 68                | 32.0 | 20.7 - 43.3 | 768 | 72.9 | 69.6 - 76.1 | 560 | 66.6              | 62.5 - 70.6 | 389   | 57.8 | 52.8 - 62.8 | 952  | 63.5              | 60.2 - 66.8 | 833   | 65.6              | 62.1 - 69.1 |
| 2005-2009                          | 58                | 37.0 | 23.9 - 50.0 | 768 | 76.9 | 73.7 - 80.0 | 472 | 69.5              | 65.3 - 73.8 | 413   | 57.0 | 52.0 - 62.0 | 961  | 66.3              | 63.0 - 69.7 | 750   | 67.2              | 63.6 - 70.8 |
| Brazilian registries               |                   |      |             |     |      |             |     |                   |             |       |      |             |      |                   |             |       |                   |             |
| 1996-1999                          | 3                 |      |             | 29  | 79.5 | 65.1 - 94.0 | 21  | 76.2              | 58.5 - 94.0 | 11    | 63.7 | 36.9 - 90.6 | 32   | 75.5 <sup>R</sup> | 64.8 - 86.2 | 32    | 72.1              | 56.7 - 87.5 |
| 2000-2004                          | 6                 |      |             | 76  | 83.2 | 74.7 - 91.6 | 51  | 68.7              | 56.1 - 81.3 | 35    | 53.2 | 36.7 - 69.7 | 90   | 67.8              | 57.7 - 78.0 | 78    | 66.5              | 55.9 - 77.0 |
| 2005-2009                          | 4                 |      |             | 67  | 77.5 | 68.1 - 87.0 | 40  | 70.6              | 58.2 - 83.0 | 21    | 52.1 | 33.9 - 70.3 | 66   | 63.2              | 52.4 - 74.0 | 66    | 70.8              | 59.4 - 82.1 |
| Chilean registries                 |                   |      |             |     |      |             |     |                   |             |       |      |             |      |                   |             |       |                   |             |
| 1998-1999                          |                   |      |             | 9   |      |             | 8   |                   |             |       |      |             | 14   | 35.8              | 12.6 - 58.9 | 3     |                   |             |
| 2000-2004                          | 1                 |      |             | 10  | 60.1 | 31.6 - 88.5 | 7   |                   |             | 3     |      |             | 13   | 77.0              | 55.1 - 99.0 | 8     |                   |             |
| 2005-2008                          |                   |      |             | 11  | 59.4 | 30.5 - 88.3 | 8   |                   |             | 4     |      |             | 9    |                   |             | 14    | 79.1              | 58.8 - 99.4 |
| Colombia (Cali)                    |                   |      |             |     |      |             |     |                   |             |       |      |             |      |                   |             |       |                   |             |
| 1995-1999                          | 8                 |      |             | 55  | 34.9 | 22.1 - 47.6 | 42  | 59.3              | 42.9 - 75.6 | 19    | 26.6 | 7.8 - 45.4  | 73   | 37.4              | 25.0 - 49.7 | 51    | 49.8 <sup>R</sup> | 38.7 - 60.8 |
| 2000-2004                          | 5                 |      |             | 54  | 57.8 | 44.4 - 71.1 | 47  | 49.2              | 33.9 - 64.4 | 30    | 39.9 | 21.4 - 58.3 | 74   | 51.7              | 39.5 - 63.9 | 62    | 47.3              | 34.8 - 59.8 |
| 2005-2009                          | 4                 |      |             | 45  | 71.9 | 58.6 - 85.3 | 38  | 53.6              | 34.7 - 72.6 | 30    | 32.1 | 15.1 - 49.2 | 51   | 54.2              | 40.6 - 67.8 | 66    | 53.3              | 41.0 - 65.6 |

Web-table 2: Precursor-cell lymphoid leukaemia (ICCC3 Ia1) - Five-year net survival (NS, %) by age group and sex: continent, country and calendar period of diagnosis

| Calendar               | Age group (years) |             |             |       |                         |              |       |                          |               |       |             |             | Sex   |                         |                     |       |                         |                    |
|------------------------|-------------------|-------------|-------------|-------|-------------------------|--------------|-------|--------------------------|---------------|-------|-------------|-------------|-------|-------------------------|---------------------|-------|-------------------------|--------------------|
|                        | <1                |             |             | 1-4   |                         |              | 5-9   |                          |               | 10-14 |             |             | Boys  |                         |                     | Girls |                         |                    |
|                        | N                 | NS %        | 95% CI      | N     | NS %                    | 95% CI       | N     | NS %                     | 95% CI        | N     | NS %        | 95% CI      | N     | NS %                    | 95% CI              | N     | NS %                    | 95% CI             |
| Ecuador (Quito)        |                   |             |             |       |                         |              |       |                          |               |       |             |             |       |                         |                     |       |                         |                    |
| 1995-1999              | 2                 |             |             | 25    | <b>64.1</b>             | 45.8 - 82.5  | 33    | <b>66.8</b>              | 51.0 - 82.6   | 21    | <b>57.4</b> | 37.1 - 77.8 | 41    | <b>58.3<sup>R</sup></b> | 46.6 - 70.0         | 40    | <b>70.0</b>             | 56.8 - 83.1        |
| 2000-2004              | 5                 |             |             | 45    | <b>66.8</b>             | 53.2 - 80.5  | 39    | <b>66.8</b>              | 52.2 - 81.4   | 21    | <b>57.4</b> | 36.8 - 77.9 | 49    | <b>60.1</b>             | 46.4 - 73.9         | 61    | <b>67.8</b>             | 55.6 - 80.0        |
| 2005-2009              |                   |             |             | 45    | <b>66.6</b>             | 53.8 - 79.4  | 24    | <b>74.7</b>              | 58.6 - 90.7   | 26    | <b>47.8</b> | 30.2 - 65.5 | 52    | <b>66.7</b>             | 54.5 - 78.9         | 43    | <b>61.1<sup>R</sup></b> | 50.6 - 71.5        |
| Puerto Rico *          |                   |             |             |       |                         |              |       |                          |               |       |             |             |       |                         |                     |       |                         |                    |
| 2000-2004              | 1                 |             |             | 32    | <b>81.4</b>             | 68.1 - 94.7  | 14    | <b>85.8</b>              | 68.1 - 100.0  | 26    | <b>69.3</b> | 51.9 - 86.6 | 40    | <b>68.2<sup>R</sup></b> | 56.9 - 79.5         | 33    | <b>90.5<sup>R</sup></b> | 81.8 - 99.2        |
| 2005-2009              | 5                 |             |             | 41    | <b>80.1</b>             | 66.8 - 93.4  | 16    | <b>81.3</b>              | 62.8 - 99.8   | 19    | <b>72.8</b> | 54.7 - 90.9 | 56    | <b>74.9</b>             | 61.6 - 88.2         | 25    | <i>81.2</i>             | <i>66.6 - 95.8</i> |
| AMERICA (North)        |                   |             |             |       |                         |              |       |                          |               |       |             |             |       |                         |                     |       |                         |                    |
| Canada *               |                   |             |             |       |                         |              |       |                          |               |       |             |             |       |                         |                     |       |                         |                    |
| 1995-1999              | 35                | <b>54.5</b> | 38.3 - 70.8 | 604   | <b>91.8</b>             | 89.6 - 94.0  | 326   | <b>88.4</b>              | 84.9 - 91.9   | 169   | <b>79.4</b> | 73.3 - 85.5 | 634   | <b>84.8</b>             | 81.5 - 88.0         | 500   | <b>87.8</b>             | 84.1 - 91.4        |
| 2000-2004              | 31                | <b>51.8</b> | 34.5 - 69.0 | 545   | <b>95.3</b>             | 93.5 - 97.1  | 320   | <b>91.6</b>              | 88.6 - 94.6   | 178   | <b>88.3</b> | 83.6 - 93.0 | 626   | <b>89.8</b>             | 87.0 - 92.5         | 448   | <b>92.6</b>             | 89.7 - 95.5        |
| 2005-2009              | 31                | <b>48.3</b> | 31.5 - 65.2 | 571   | <b>94.6</b>             | 92.7 - 96.5  | 320   | <b>93.8</b>              | 91.2 - 96.5   | 175   | <b>86.3</b> | 80.9 - 91.6 | 628   | <b>90.2</b>             | 87.3 - 93.0         | 469   | <b>91.5</b>             | 88.4 - 94.7        |
| US registries          |                   |             |             |       |                         |              |       |                          |               |       |             |             |       |                         |                     |       |                         |                    |
| 1995-1999              | 259               | <b>55.8</b> | 49.7 - 61.9 | 3,907 | <b>90.8</b>             | 89.9 - 91.8  | 2,252 | <b>86.6</b>              | 85.2 - 88.1   | 1,252 | <b>73.3</b> | 70.8 - 75.7 | 4,261 | <b>81.5</b>             | 80.1 - 82.9         | 3,409 | <b>84.6</b>             | 83.1 - 86.0        |
| 2000-2004              | 335               | <b>60.0</b> | 54.7 - 65.3 | 4,519 | <b>93.0</b>             | 92.3 - 93.8  | 2,448 | <b>89.5</b>              | 88.3 - 90.8   | 1,540 | <b>79.6</b> | 77.5 - 81.6 | 4,855 | <b>86.0</b>             | 84.9 - 87.2         | 3,987 | <b>87.4</b>             | 86.2 - 88.6        |
| 2005-2009              | 337               | <b>59.4</b> | 54.1 - 64.7 | 4,983 | <b>94.4</b>             | 93.7 - 95.0  | 2,688 | <b>90.6</b>              | 89.5 - 91.7   | 1,727 | <b>80.5</b> | 78.5 - 82.4 | 5,400 | <b>86.9</b>             | 85.8 - 88.0         | 4,335 | <b>88.7</b>             | 87.6 - 89.9        |
| ASIA                   |                   |             |             |       |                         |              |       |                          |               |       |             |             |       |                         |                     |       |                         |                    |
| Chinese registries     |                   |             |             |       |                         |              |       |                          |               |       |             |             |       |                         |                     |       |                         |                    |
| 1995-1999              | 1                 |             |             | 11    | <b>9.1</b>              | 0.0 - 22.5   | 11    | <b>18.2</b>              | 0.0 - 38.0    | 5     |             |             | 14    | <i>0.0</i>              |                     | 14    | <i>17.9</i>             | <i>0.0 - 36.6</i>  |
| 2000-2004              | 2                 |             |             | 34    | <b>49.0</b>             | 32.2 - 65.8  | 25    | <b>71.1</b>              | 53.4 - 88.8   | 23    | <b>29.0</b> | 10.9 - 47.1 | 45    | <b>54.4</b>             | 40.7 - 68.2         | 39    | <b>42.4</b>             | 30.2 - 54.6        |
| 2005-2009              | 8                 |             |             | 58    | <b>84.2</b>             | 74.0 - 94.4  | 45    | <b>76.9</b>              | 63.6 - 90.2   | 40    | <b>52.6</b> | 34.3 - 71.0 | 92    | <b>73.0</b>             | 63.2 - 82.8         | 59    | <b>63.3</b>             | 49.2 - 77.4        |
| Cyprus *               |                   |             |             |       |                         |              |       |                          |               |       |             |             |       |                         |                     |       |                         |                    |
| 2004-2009              | 1                 |             |             | 14    | <b>92.4<sup>M</sup></b> | 78.4 - 100.0 | 10    | <b>100.0<sup>M</sup></b> | 100.0 - 100.0 | 9     |             |             | 18    | <i>93.4<sup>M</sup></i> | <i>81.2 - 100.0</i> | 16    | <i>73.2<sup>M</sup></i> | <i>51.2 - 95.2</i> |
| India (Karunagappally) |                   |             |             |       |                         |              |       |                          |               |       |             |             |       |                         |                     |       |                         |                    |
| 1995-1999              | 1                 |             |             | 6     |                         |              | 8     |                          |               | 2     |             |             | 11    | <i>63.9</i>             | <i>37.0 - 90.9</i>  | 6     |                         |                    |
| 2000-2004              |                   |             |             | 6     |                         |              | 3     |                          |               | 5     |             |             | 9     |                         |                     | 5     |                         |                    |
| 2005-2009              |                   |             |             | 6     |                         |              | 5     |                          |               | 1     |             |             | 10    | <i>74.8</i>             | <i>50.8 - 98.9</i>  | 2     |                         |                    |
| Indonesia (Jakarta)    |                   |             |             |       |                         |              |       |                          |               |       |             |             |       |                         |                     |       |                         |                    |
| 2005-2007              |                   |             |             | 5     |                         |              | 5     |                          |               | 4     |             |             | 8     |                         |                     | 6     |                         |                    |

Web-table 2: Precursor-cell lymphoid leukaemia (ICCC3 Ia1) - Five-year net survival (NS, %) by age group and sex: continent, country and calendar period of diagnosis

| Calendar            | Age group (years) |             |             |     |             |              |     |             |              |       |             |             | Sex  |                          |              |       |                          |              |
|---------------------|-------------------|-------------|-------------|-----|-------------|--------------|-----|-------------|--------------|-------|-------------|-------------|------|--------------------------|--------------|-------|--------------------------|--------------|
|                     | <1                |             |             | 1-4 |             |              | 5-9 |             |              | 10-14 |             |             | Boys |                          |              | Girls |                          |              |
|                     | N                 | NS %        | 95% CI      | N   | NS %        | 95% CI       | N   | NS %        | 95% CI       | N     | NS %        | 95% CI      | N    | NS %                     | 95% CI       | N     | NS %                     | 95% CI       |
| Israel *            |                   |             |             |     |             |              |     |             |              |       |             |             |      |                          |              |       |                          |              |
| 1995-1999           |                   | 7           |             | 88  | <b>93.3</b> | 88.0 - 98.5  | 63  | <b>82.6</b> | 73.3 - 91.9  | 30    | <b>66.7</b> | 50.2 - 83.2 | 102  | <b>78.6</b>              | 69.7 - 87.5  | 86    | <b>83.8</b>              | 75.0 - 92.6  |
| 2000-2004           |                   | 9           |             | 121 | <b>91.8</b> | 86.9 - 96.7  | 87  | <b>87.4</b> | 80.5 - 94.4  | 41    | <b>83.0</b> | 71.6 - 94.4 | 144  | <b>87.6</b>              | 81.5 - 93.6  | 114   | <b>84.1</b>              | 76.4 - 91.9  |
| 2005-2009           | 10                | <b>42.4</b> | 16.8 - 68.0 | 136 | <b>93.2</b> | 88.8 - 97.5  | 67  | <b>86.8</b> | 79.2 - 94.4  | 58    | <b>78.2</b> | 67.2 - 89.2 | 155  | <b>82.5</b>              | 75.8 - 89.1  | 116   | <b>87.5</b>              | 80.9 - 94.0  |
| Japanese registries |                   |             |             |     |             |              |     |             |              |       |             |             |      |                          |              |       |                          |              |
| 1995-1999           | 11                | <b>45.6</b> | 18.1 - 73.1 | 140 | <b>82.8</b> | 76.5 - 89.0  | 82  | <b>87.9</b> | 80.8 - 94.9  | 61    | <b>66.2</b> | 54.3 - 78.2 | 167  | <b>75.7</b>              | 68.9 - 82.6  | 127   | <b>81.2</b>              | 73.8 - 88.6  |
| 2000-2004           | 15                | <b>64.4</b> | 40.4 - 88.4 | 202 | <b>89.8</b> | 85.4 - 94.2  | 118 | <b>79.1</b> | 71.5 - 86.7  | 71    | <b>66.7</b> | 55.1 - 78.3 | 229  | <b>71.6</b>              | 64.6 - 78.6  | 177   | <b>85.8</b>              | 79.6 - 91.9  |
| 2005-2009           | 12                | <b>73.8</b> | 49.5 - 98.1 | 109 | <b>92.4</b> | 88.1 - 96.7  | 84  | <b>83.8</b> | 76.9 - 90.6  | 54    | <b>71.6</b> | 60.5 - 82.6 | 140  | <b>77.3</b>              | 70.7 - 84.0  | 119   | <b>87.8</b>              | 82.0 - 93.7  |
| Korea * †           |                   |             |             |     |             |              |     |             |              |       |             |             |      |                          |              |       |                          |              |
| 1995-1999           | 49                | <b>34.9</b> | 21.7 - 48.0 | 528 | <b>74.4</b> | 70.6 - 78.1  | 353 | <b>67.5</b> | 62.6 - 72.4  | 241   | <b>51.1</b> | 44.8 - 57.4 | 674  | <b>60.7</b>              | 56.7 - 64.6  | 497   | <b>66.4</b>              | 62.1 - 70.7  |
| 2000-2004           | 48                | <b>41.8</b> | 28.1 - 55.5 | 514 | <b>84.1</b> | 81.0 - 87.3  | 383 | <b>76.6</b> | 72.3 - 80.8  | 252   | <b>62.4</b> | 56.4 - 68.3 | 724  | <b>72.8</b>              | 69.3 - 76.3  | 473   | <b>73.8</b>              | 69.6 - 78.0  |
| 2005-2009           | 53                | <b>46.6</b> | 33.0 - 60.2 | 460 | <b>84.6</b> | 81.4 - 87.9  | 326 | <b>79.7</b> | 75.4 - 84.0  | 298   | <b>70.6</b> | 65.2 - 75.9 | 630  | <b>77.4</b>              | 74.0 - 80.7  | 507   | <b>76.8</b>              | 72.9 - 80.7  |
| Malaysia (Penang)   |                   |             |             |     |             |              |     |             |              |       |             |             |      |                          |              |       |                          |              |
| 1995-1999           | 3                 |             |             | 22  | <b>82.0</b> | 66.2 - 97.7  | 16  | <b>87.6</b> | 71.9 - 100.0 | 10    | <b>60.1</b> | 31.6 - 88.6 | 32   | 78.3                     | 64.2 - 92.4  | 19    | 84.2                     | 68.3 - 100.0 |
| 2000-2004           | 6                 |             |             | 25  | <b>92.1</b> | 81.7 - 100.0 | 16  | <b>87.5</b> | 71.9 - 100.0 | 4     |             |             | 26   | 92.5                     | 82.4 - 100.0 | 25    | 80.0                     | 64.7 - 95.4  |
| 2005-2009           |                   |             |             | 25  | <b>84.2</b> | 68.1 - 100.0 | 17  | <b>81.2</b> | 62.5 - 99.9  | 15    | <b>42.6</b> | 16.0 - 69.3 | 36   | <b>82.5</b> <sup>R</sup> | 71.4 - 93.6  | 21    | 61.1                     | 40.6 - 81.7  |
| Mongolia *          |                   |             |             |     |             |              |     |             |              |       |             |             |      |                          |              |       |                          |              |
| 2005-2009           | 3                 |             |             | 4   |             |              | 11  | <b>0.0</b>  | 0.0 - 0.0    | 6     |             |             | 17   | 0.0                      | 0.0 - 0.0    | 7     |                          |              |
| Taiwan *            |                   |             |             |     |             |              |     |             |              |       |             |             |      |                          |              |       |                          |              |
| 1995-1999           | 23                | <b>30.6</b> | 12.5 - 48.6 | 282 | <b>74.6</b> | 69.5 - 79.6  | 172 | <b>66.9</b> | 59.9 - 73.9  | 124   | <b>49.3</b> | 40.5 - 58.0 | 346  | <b>63.5</b>              | 58.3 - 68.7  | 255   | <b>60.9</b>              | 54.2 - 67.5  |
| 2000-2004           | 36                | <b>33.5</b> | 18.4 - 48.5 | 317 | <b>82.7</b> | 78.6 - 86.9  | 196 | <b>77.1</b> | 71.2 - 83.0  | 116   | <b>61.3</b> | 52.5 - 70.1 | 381  | <b>69.1</b>              | 64.0 - 74.2  | 284   | <b>76.1</b>              | 70.4 - 81.7  |
| 2005-2009           | 26                | <b>31.5</b> | 15.2 - 47.8 | 277 | <b>86.5</b> | 82.7 - 90.4  | 168 | <b>81.5</b> | 75.7 - 87.3  | 139   | <b>71.2</b> | 63.3 - 79.1 | 355  | <b>77.2</b>              | 72.6 - 81.9  | 255   | <b>79.4</b>              | 74.0 - 84.8  |
| Thai registries     |                   |             |             |     |             |              |     |             |              |       |             |             |      |                          |              |       |                          |              |
| 1995-1999           | 8                 |             |             | 55  | <b>48.3</b> | 34.4 - 62.1  | 25  | <b>50.0</b> | 30.2 - 69.7  | 14    | <b>54.7</b> | 29.0 - 80.3 | 52   | <b>44.9</b> <sup>R</sup> | 33.1 - 56.6  | 50    | <b>57.4</b> <sup>R</sup> | 45.1 - 69.7  |
| 2000-2004           | 7                 |             |             | 53  | <b>69.5</b> | 57.0 - 82.0  | 42  | <b>63.8</b> | 49.3 - 78.4  | 18    | <b>44.6</b> | 22.6 - 66.6 | 74   | <b>57.1</b>              | 45.5 - 68.6  | 46    | <b>66.5</b> <sup>R</sup> | 55.2 - 77.7  |
| 2005-2009           | 4                 |             |             | 36  | <b>62.5</b> | 47.7 - 77.3  | 32  | <b>47.1</b> | 30.9 - 63.4  | 30    | <b>53.8</b> | 34.2 - 73.3 | 58   | <b>52.3</b>              | 40.1 - 64.6  | 44    | <b>58.4</b>              | 42.8 - 74.1  |

Web-table 2: Precursor-cell lymphoid leukaemia (ICCC3 Ia1) - Five-year net survival (NS, %) by age group and sex: continent, country and calendar period of diagnosis

| Calendar       | Age group (years) |                         |            |     |                         |              |     |                         |             |       |                         |             | Sex  |                         |                    |       |                         |                    |
|----------------|-------------------|-------------------------|------------|-----|-------------------------|--------------|-----|-------------------------|-------------|-------|-------------------------|-------------|------|-------------------------|--------------------|-------|-------------------------|--------------------|
|                | <1                |                         |            | 1-4 |                         |              | 5-9 |                         |             | 10-14 |                         |             | Boys |                         |                    | Girls |                         |                    |
|                | N                 | NS %                    | 95% CI     | N   | NS %                    | 95% CI       | N   | NS %                    | 95% CI      | N     | NS %                    | 95% CI      | N    | NS %                    | 95% CI             | N     | NS %                    | 95% CI             |
| Turkey (Izmir) |                   |                         |            |     |                         |              |     |                         |             |       |                         |             |      |                         |                    |       |                         |                    |
| 1995-1999      | 5                 |                         |            | 56  | <b>65.3</b>             | 52.4 - 78.3  | 31  | <b>69.5</b>             | 52.2 - 86.8 | 24    | <b>57.8</b>             | 37.3 - 78.2 | 60   | <b>57.4<sup>R</sup></b> | 46.6 - 68.2        | 56    | <b>71.6</b>             | 58.8 - 84.5        |
| 2000-2004      | 3                 |                         |            | 62  | <b>73.9</b>             | 62.9 - 84.9  | 41  | <b>82.5</b>             | 70.8 - 94.2 | 25    | <b>56.6</b>             | 36.9 - 76.3 | 68   | <b>64.2</b>             | 51.8 - 76.6        | 63    | <b>76.2</b>             | 64.8 - 87.7        |
| 2005-2009      | 6                 |                         |            | 78  | <b>80.6</b>             | 71.6 - 89.6  | 49  | <b>84.2</b>             | 73.5 - 95.0 | 28    | <b>62.0</b>             | 44.7 - 79.3 | 83   | <b>74.2</b>             | 63.1 - 85.2        | 78    | <b>72.4</b>             | 62.0 - 82.7        |
| <b>EUROPE</b>  |                   |                         |            |     |                         |              |     |                         |             |       |                         |             |      |                         |                    |       |                         |                    |
| Austria *      |                   |                         |            |     |                         |              |     |                         |             |       |                         |             |      |                         |                    |       |                         |                    |
| 1995-1999      | 5                 |                         |            | 126 | <b>95.3</b>             | 91.6 - 99.0  | 74  | <b>86.5</b>             | 78.8 - 94.3 | 35    | <b>80.1</b>             | 67.0 - 93.1 | 142  | <b>88.3</b>             | 81.8 - 94.8        | 98    | <b>84.1</b>             | 75.6 - 92.6        |
| 2000-2004      | 6                 |                         |            | 98  | <b>97.0</b>             | 93.6 - 100.0 | 57  | <b>87.8</b>             | 79.3 - 96.2 | 47    | <b>85.2</b>             | 75.1 - 95.3 | 110  | <b>92.9</b>             | 87.7 - 98.0        | 98    | <b>86.4</b>             | 79.2 - 93.5        |
| 2005-2009      | 9                 |                         |            | 100 | <b>99.1</b>             | 97.1 - 100.0 | 72  | <b>89.8</b>             | 82.7 - 97.0 | 40    | <b>86.3</b>             | 76.1 - 96.4 | 123  | <b>94.6</b>             | 90.1 - 99.1        | 98    | <b>87.1</b>             | 79.2 - 95.0        |
| Belarus *      |                   |                         |            |     |                         |              |     |                         |             |       |                         |             |      |                         |                    |       |                         |                    |
| 1995-1999      | 8                 |                         |            | 112 | <b>83.2</b>             | 76.2 - 90.1  | 96  | <b>80.1</b>             | 72.1 - 88.1 | 66    | <b>63.8</b>             | 52.3 - 75.3 | 156  | <b>70.2</b>             | 63.0 - 77.3        | 126   | <b>81.2</b>             | 74.0 - 88.4        |
| 2000-2004      | 2                 |                         |            | 110 | <b>84.6</b>             | 77.9 - 91.4  | 62  | <b>82.1</b>             | 72.6 - 91.7 | 61    | <b>69.0</b>             | 57.5 - 80.5 | 133  | <b>78.3</b>             | 71.0 - 85.6        | 102   | <b>78.6</b>             | 70.5 - 86.7        |
| 2005-2009      | 8                 |                         |            | 101 | <b>91.1</b>             | 85.4 - 96.7  | 65  | <b>92.0</b>             | 85.3 - 98.8 | 35    | <b>84.2</b>             | 73.5 - 95.0 | 101  | <b>91.2</b>             | 85.5 - 96.9        | 108   | <b>86.1</b>             | 79.1 - 93.1        |
| Belgium *      |                   |                         |            |     |                         |              |     |                         |             |       |                         |             |      |                         |                    |       |                         |                    |
| 2004-2009      | 12                | <b>33.1<sup>M</sup></b> | 6.5 - 59.7 | 191 | <b>93.2<sup>M</sup></b> | 88.6 - 97.9  | 105 | <b>86.1<sup>M</sup></b> | 78.4 - 93.9 | 78    | <b>84.8<sup>M</sup></b> | 75.5 - 94.1 | 230  | <b>87.1<sup>M</sup></b> | 81.5 - 92.6        | 156   | <b>87.7<sup>M</sup></b> | 81.4 - 94.0        |
| Bulgaria *     |                   |                         |            |     |                         |              |     |                         |             |       |                         |             |      |                         |                    |       |                         |                    |
| 1995-1999      | 10                | <b>20.2</b>             | 0.0 - 41.4 | 68  | <b>63.4</b>             | 52.0 - 74.8  | 47  | <b>66.0</b>             | 52.7 - 79.4 | 41    | <b>48.9</b>             | 33.8 - 63.9 | 86   | <b>52.0</b>             | 42.0 - 62.0        | 80    | <b>63.2</b>             | 52.8 - 73.6        |
| 2000-2004      | 4                 |                         |            | 67  | <b>76.3</b>             | 66.1 - 86.4  | 53  | <b>58.6</b>             | 45.5 - 71.7 | 30    | <b>53.5</b>             | 36.0 - 70.9 | 86   | <b>61.1</b>             | 50.5 - 71.8        | 68    | <b>62.2</b>             | 50.6 - 73.8        |
| 2005-2009      | 6                 |                         |            | 95  | <b>82.3</b>             | 74.1 - 90.6  | 76  | <b>74.1</b>             | 63.3 - 85.0 | 38    | <b>61.8</b>             | 46.5 - 77.0 | 119  | <b>67.4</b>             | 57.9 - 76.9        | 96    | <b>76.3</b>             | 66.4 - 86.3        |
| Croatia *      |                   |                         |            |     |                         |              |     |                         |             |       |                         |             |      |                         |                    |       |                         |                    |
| 1998-1999      | 2                 |                         |            | 20  | <b>90.1</b>             | 77.3 - 100.0 | 14  | <b>78.6</b>             | 58.0 - 99.3 | 8     |                         |             | 17   | <i>64.8</i>             | <i>42.9 - 86.8</i> | 27    | <i>77.9</i>             | <i>62.6 - 93.2</i> |
| 2000-2004      | 5                 |                         |            | 87  | <b>91.0</b>             | 84.9 - 97.0  | 47  | <b>85.2</b>             | 75.1 - 95.2 | 21    | <b>71.4</b>             | 52.7 - 90.2 | 95   | <b>76.9</b>             | 67.0 - 86.8        | 65    | <b>90.2<sup>R</sup></b> | 84.2 - 96.3        |
| 2005-2009      | 2                 |                         |            | 61  | <b>93.8</b>             | 87.7 - 99.8  | 41  | <b>82.5</b>             | 70.8 - 94.2 | 42    | <b>82.3</b>             | 70.4 - 94.1 | 89   | <b>85.0</b>             | 77.2 - 92.8        | 57    | <b>88.0</b>             | 79.9 - 96.2        |
| Denmark *      |                   |                         |            |     |                         |              |     |                         |             |       |                         |             |      |                         |                    |       |                         |                    |
| 1995-1999      | 1                 |                         |            | 96  | <b>87.5</b>             | 81.0 - 94.1  | 38  | <b>86.9</b>             | 76.3 - 97.5 | 28    | <b>82.2</b>             | 68.3 - 96.1 | 89   | <b>84.8</b>             | 76.7 - 92.9        | 74    | <b>87.3</b>             | 78.5 - 96.0        |
| 2000-2004      | 5                 |                         |            | 114 | <b>92.2</b>             | 87.2 - 97.1  | 49  | <b>83.7</b>             | 73.5 - 94.0 | 41    | <b>78.1</b>             | 65.7 - 90.6 | 125  | <b>83.2</b>             | 75.6 - 90.7        | 84    | <b>86.3</b>             | 78.2 - 94.5        |
| 2005-2009      | 4                 |                         |            | 92  | <b>93.0</b>             | 88.0 - 98.0  | 55  | <b>84.8</b>             | 75.2 - 94.5 | 20    | <b>85.4</b>             | 72.4 - 98.4 | 97   | <b>85.7</b>             | 77.9 - 93.6        | 74    | <b>89.2</b>             | 81.5 - 96.9        |

Web-table 2: Precursor-cell lymphoid leukaemia (ICCC3 Ia1) - Five-year net survival (NS, %) by age group and sex: continent, country and calendar period of diagnosis

| Calendar           | Age group (years) |             |             |     |             |              |     |             |             |       |             |             | Sex   |             |             |       |                          |             |
|--------------------|-------------------|-------------|-------------|-----|-------------|--------------|-----|-------------|-------------|-------|-------------|-------------|-------|-------------|-------------|-------|--------------------------|-------------|
|                    | <1                |             |             | 1-4 |             |              | 5-9 |             |             | 10-14 |             |             | Boys  |             |             | Girls |                          |             |
|                    | N                 | NS %        | 95% CI      | N   | NS %        | 95% CI       | N   | NS %        | 95% CI      | N     | NS %        | 95% CI      | N     | NS %        | 95% CI      | N     | NS %                     | 95% CI      |
| Estonia *          |                   |             |             |     |             |              |     |             |             |       |             |             |       |             |             |       |                          |             |
| 1995-1999          | 1                 |             |             | 11  | <b>72.8</b> | 47.8 - 97.7  | 10  | <b>30.0</b> | 4.5 - 55.6  | 7     |             |             | 9     |             |             | 20    | 50.1                     | 28.9 - 71.2 |
| 2000-2004          |                   |             |             | 13  | <b>75.6</b> | 52.6 - 98.7  | 7   |             |             | 11    | <b>45.6</b> | 18.1 - 73.0 | 17    | 56.6        | 33.3 - 79.9 | 14    | 64.4                     | 40.4 - 88.4 |
| 2005-2008          | 1                 |             |             | 5   |             |              | 1   |             |             | 6     |             |             | 6     |             |             | 7     |                          |             |
| Finland *          |                   |             |             |     |             |              |     |             |             |       |             |             |       |             |             |       |                          |             |
| 1995-1999          | 6                 |             |             | 102 | <b>89.3</b> | 83.3 - 95.3  | 51  | <b>76.5</b> | 65.0 - 88.0 | 34    | <b>82.4</b> | 69.8 - 95.0 | 100   | <b>86.9</b> | 79.7 - 94.2 | 93    | <b>78.0</b>              | 68.4 - 87.7 |
| 2000-2004          | 6                 |             |             | 117 | <b>90.6</b> | 85.4 - 95.9  | 44  | <b>88.7</b> | 79.4 - 98.0 | 24    | <b>75.1</b> | 58.2 - 92.0 | 102   | <b>81.1</b> | 72.1 - 90.1 | 89    | <b>90.9</b> <sup>R</sup> | 85.4 - 96.5 |
| 2005-2009          | 14                | <b>69.3</b> | 41.5 - 97.2 | 99  | <b>87.3</b> | 80.9 - 93.8  | 59  | <b>81.5</b> | 71.1 - 91.9 | 33    | <b>78.0</b> | 62.4 - 93.7 | 118   | <b>79.2</b> | 70.0 - 88.5 | 87    | <b>84.0</b>              | 74.7 - 93.4 |
| France *           |                   |             |             |     |             |              |     |             |             |       |             |             |       |             |             |       |                          |             |
| 1995-1999          | 49                | <b>47.1</b> | 33.3 - 60.9 | 833 | <b>88.8</b> | 86.6 - 90.9  | 522 | <b>86.8</b> | 83.9 - 89.7 | 324   | <b>74.0</b> | 69.2 - 78.8 | 960   | <b>81.9</b> | 79.2 - 84.6 | 768   | <b>83.2</b>              | 80.2 - 86.2 |
| 2000-2004          | 51                | <b>60.9</b> | 47.6 - 74.2 | 873 | <b>93.3</b> | 91.6 - 95.0  | 530 | <b>89.1</b> | 86.4 - 91.7 | 339   | <b>83.8</b> | 79.9 - 87.8 | 957   | <b>86.4</b> | 84.0 - 88.8 | 836   | <b>90.4</b>              | 88.1 - 92.7 |
| 2005-2009          | 53                | <b>43.9</b> | 30.0 - 57.9 | 888 | <b>94.7</b> | 93.2 - 96.2  | 535 | <b>91.4</b> | 89.0 - 93.8 | 352   | <b>84.1</b> | 80.1 - 88.0 | 1,015 | <b>87.2</b> | 84.9 - 89.6 | 813   | <b>91.9</b>              | 89.7 - 94.0 |
| German registries  |                   |             |             |     |             |              |     |             |             |       |             |             |       |             |             |       |                          |             |
| 1995-1999          | 11                | <b>70.2</b> | 43.4 - 97.1 | 204 | <b>91.7</b> | 87.9 - 95.5  | 153 | <b>87.6</b> | 82.4 - 92.8 | 100   | <b>81.1</b> | 73.4 - 88.8 | 274   | <b>85.0</b> | 80.5 - 89.6 | 194   | <b>88.5</b>              | 83.6 - 93.4 |
| 2000-2004          | 17                | <b>63.5</b> | 40.9 - 86.1 | 281 | <b>89.4</b> | 85.8 - 93.0  | 186 | <b>89.8</b> | 85.4 - 94.2 | 158   | <b>83.6</b> | 77.8 - 89.4 | 363   | <b>87.0</b> | 83.4 - 90.5 | 279   | <b>86.9</b>              | 82.6 - 91.1 |
| 2005-2009          | 31                | <b>55.4</b> | 36.8 - 74.0 | 501 | <b>94.0</b> | 91.6 - 96.4  | 280 | <b>93.1</b> | 89.8 - 96.4 | 177   | <b>89.7</b> | 85.1 - 94.2 | 535   | <b>90.3</b> | 87.4 - 93.3 | 454   | <b>93.2</b>              | 90.4 - 96.0 |
| Iceland *          |                   |             |             |     |             |              |     |             |             |       |             |             |       |             |             |       |                          |             |
| 1995-1999          | 1                 |             |             | 6   |             |              | 2   |             |             |       |             |             | 6     |             |             | 3     |                          |             |
| 2000-2004          | 3                 |             |             | 4   |             |              | 1   |             |             | 1     |             |             | 5     |             |             | 4     |                          |             |
| 2005-2009          |                   |             |             | 6   |             |              | 2   |             |             | 2     |             |             | 4     |             |             | 6     |                          |             |
| Ireland *          |                   |             |             |     |             |              |     |             |             |       |             |             |       |             |             |       |                          |             |
| 1995-1999          | 4                 |             |             | 78  | <b>84.7</b> | 76.7 - 92.6  | 39  | <b>87.2</b> | 76.9 - 97.6 | 25    | <b>68.1</b> | 50.2 - 86.0 | 78    | <b>82.7</b> | 73.7 - 91.7 | 68    | <b>76.0</b>              | 65.1 - 86.9 |
| 2000-2004          | 4                 |             |             | 63  | <b>88.9</b> | 81.2 - 96.6  | 43  | <b>86.1</b> | 75.9 - 96.3 | 35    | <b>77.2</b> | 63.5 - 90.9 | 79    | <b>86.1</b> | 78.3 - 94.0 | 66    | <b>79.2</b>              | 69.3 - 89.0 |
| 2005-2009          | 10                | <b>56.1</b> | 25.4 - 86.8 | 91  | <b>97.1</b> | 93.1 - 100.0 | 34  | <b>87.6</b> | 77.6 - 97.7 | 27    | <b>73.9</b> | 58.6 - 89.2 | 93    | <b>88.9</b> | 81.6 - 96.2 | 69    | <b>79.1</b>              | 68.5 - 89.8 |
| Italian registries |                   |             |             |     |             |              |     |             |             |       |             |             |       |             |             |       |                          |             |
| 1995-1999          | 21                | <b>43.0</b> | 22.6 - 63.4 | 302 | <b>89.8</b> | 86.4 - 93.2  | 214 | <b>85.8</b> | 81.1 - 90.6 | 124   | <b>78.5</b> | 71.2 - 85.8 | 358   | <b>83.1</b> | 78.7 - 87.4 | 303   | <b>84.6</b>              | 80.1 - 89.0 |
| 2000-2004          | 33                | <b>69.4</b> | 53.8 - 85.0 | 375 | <b>94.4</b> | 92.1 - 96.8  | 203 | <b>87.7</b> | 83.2 - 92.2 | 114   | <b>67.3</b> | 58.7 - 75.9 | 411   | <b>80.8</b> | 76.5 - 85.2 | 314   | <b>85.2</b>              | 80.1 - 90.2 |
| 2005-2009          | 13                | <b>51.9</b> | 30.3 - 73.6 | 257 | <b>94.2</b> | 91.7 - 96.7  | 148 | <b>85.1</b> | 80.0 - 90.2 | 89    | <b>87.0</b> | 80.3 - 93.6 | 269   | <b>84.4</b> | 79.8 - 89.0 | 238   | <b>92.1</b>              | 88.7 - 95.4 |

Web-table 2: Precursor-cell lymphoid leukaemia (ICCC3 Ia1) - Five-year net survival (NS, %) by age group and sex: continent, country and calendar period of diagnosis

| Calendar         | Age group (years) |             |              |     |             |              |     |             |              |       |             |             | Sex  |                          |              |       |                          |              |
|------------------|-------------------|-------------|--------------|-----|-------------|--------------|-----|-------------|--------------|-------|-------------|-------------|------|--------------------------|--------------|-------|--------------------------|--------------|
|                  | <1                |             |              | 1-4 |             |              | 5-9 |             |              | 10-14 |             |             | Boys |                          |              | Girls |                          |              |
|                  | N                 | NS %        | 95% CI       | N   | NS %        | 95% CI       | N   | NS %        | 95% CI       | N     | NS %        | 95% CI      | N    | NS %                     | 95% CI       | N     | NS %                     | 95% CI       |
| Latvia *         |                   |             |              |     |             |              |     |             |              |       |             |             |      |                          |              |       |                          |              |
| 1995-1999        | 2                 |             |              | 5   |             |              | 3   |             |              | 5     |             |             | 6    |                          |              | 9     |                          |              |
| 2000-2004        |                   |             |              | 21  | <b>95.4</b> | 86.5 - 100.0 | 8   |             |              | 6     |             |             | 18   | 89.1                     | 75.0 - 100.0 | 17    | 94.1                     | 83.3 - 100.0 |
| 2005-2009        |                   |             |              | 24  | <b>87.1</b> | 73.6 - 100.0 | 14  | <b>71.9</b> | 45.9 - 97.8  | 7     |             |             | 24   | <b>71.5</b> <sup>R</sup> | 56.6 - 86.5  | 21    | 89.3                     | 75.5 - 100.0 |
| Lithuania *      |                   |             |              |     |             |              |     |             |              |       |             |             |      |                          |              |       |                          |              |
| 1995-1999        | 1                 |             |              | 54  | <b>57.5</b> | 44.5 - 70.5  | 29  | <b>69.0</b> | 52.5 - 85.5  | 18    | <b>50.2</b> | 27.9 - 72.4 | 65   | <b>61.1</b>              | 49.1 - 73.0  | 37    | <b>58.2</b> <sup>R</sup> | 45.2 - 71.3  |
| 2000-2004        | 3                 |             |              | 44  | <b>81.9</b> | 70.6 - 93.2  | 41  | <b>75.3</b> | 62.1 - 88.5  | 18    | <b>66.7</b> | 45.7 - 87.8 | 53   | <b>81.8</b> <sup>R</sup> | 73.5 - 90.0  | 53    | <b>69.1</b> <sup>R</sup> | 59.4 - 78.9  |
| 2005-2009        | 2                 |             |              | 46  | <b>91.1</b> | 82.8 - 99.4  | 27  | <b>74.4</b> | 58.3 - 90.5  | 11    | <b>44.2</b> | 18.6 - 69.7 | 36   | 79.4                     | 65.9 - 92.9  | 50    | <b>70.6</b> <sup>R</sup> | 60.7 - 80.6  |
| Malta *          |                   |             |              |     |             |              |     |             |              |       |             |             |      |                          |              |       |                          |              |
| 1995-1999        |                   |             |              | 9   |             |              | 7   |             |              | 3     |             |             | 12   | 66.7                     | 41.4 - 92.1  | 7     |                          |              |
| 2000-2004        |                   |             |              | 5   |             |              | 8   |             |              | 3     |             |             | 11   | 81.9                     | 60.2 - 100.0 | 5     |                          |              |
| 2005-2009        |                   |             |              | 10  | <b>90.2</b> | 72.5 - 100.0 | 3   |             |              | 4     |             |             | 8    |                          |              | 9     |                          |              |
| Netherlands *    |                   |             |              |     |             |              |     |             |              |       |             |             |      |                          |              |       |                          |              |
| 1995-1999        | 17                | <b>35.4</b> | 13.8 - 56.9  | 281 | <b>88.0</b> | 84.1 - 91.8  | 143 | <b>82.3</b> | 76.0 - 88.6  | 86    | <b>75.7</b> | 66.6 - 84.7 | 335  | <b>81.2</b>              | 76.4 - 86.0  | 192   | <b>80.2</b>              | 73.5 - 86.9  |
| 2000-2004        | 24                | <b>62.7</b> | 43.7 - 81.6  | 290 | <b>92.4</b> | 89.4 - 95.5  | 159 | <b>89.4</b> | 84.6 - 94.1  | 109   | <b>72.5</b> | 64.2 - 80.9 | 347  | <b>83.2</b>              | 78.9 - 87.5  | 235   | <b>85.1</b>              | 79.7 - 90.5  |
| 2005-2009        | 23                | <b>67.0</b> | 47.4 - 86.6  | 245 | <b>89.4</b> | 85.7 - 93.1  | 180 | <b>89.9</b> | 85.3 - 94.4  | 85    | <b>81.1</b> | 73.0 - 89.1 | 291  | <b>86.1</b>              | 81.7 - 90.4  | 242   | <b>86.6</b>              | 81.4 - 91.8  |
| Norway *         |                   |             |              |     |             |              |     |             |              |       |             |             |      |                          |              |       |                          |              |
| 1995-1999        | 6                 |             |              | 96  | <b>88.4</b> | 82.0 - 94.9  | 54  | <b>79.7</b> | 69.0 - 90.3  | 21    | <b>70.5</b> | 51.1 - 89.8 | 88   | <b>77.3</b>              | 66.9 - 87.6  | 89    | <b>81.0</b>              | 70.1 - 91.9  |
| 2000-2004        | 4                 |             |              | 97  | <b>86.3</b> | 79.4 - 93.2  | 47  | <b>89.4</b> | 80.7 - 98.1  | 30    | <b>86.7</b> | 74.8 - 98.7 | 94   | <b>86.5</b>              | 78.6 - 94.3  | 84    | <b>89.1</b>              | 82.3 - 96.0  |
| 2005-2009        | 9                 |             |              | 94  | <b>92.0</b> | 86.3 - 97.7  | 41  | <b>93.5</b> | 86.4 - 100.0 | 25    | <b>85.9</b> | 73.3 - 98.6 | 84   | <b>91.4</b>              | 85.1 - 97.7  | 85    | <b>88.2</b>              | 80.2 - 96.2  |
| Poland (Wroclaw) |                   |             |              |     |             |              |     |             |              |       |             |             |      |                          |              |       |                          |              |
| 2000-2004        | 2                 |             |              | 15  | <b>80.1</b> | 60.5 - 99.6  | 6   |             |              | 10    | <b>50.0</b> | 21.2 - 78.8 | 18   | 61.2                     | 39.4 - 82.9  | 15    | 80.0                     | 60.5 - 99.5  |
| 2005-2009        | 2                 |             |              | 25  | <b>89.8</b> | 76.4 - 100.0 | 18  | <b>86.2</b> | 69.0 - 100.0 | 17    | <b>65.9</b> | 44.5 - 87.3 | 44   | <b>78.0</b>              | 65.2 - 90.8  | 18    | 88.3                     | 73.3 - 100.0 |
| Portugal *       |                   |             |              |     |             |              |     |             |              |       |             |             |      |                          |              |       |                          |              |
| 1998-1999        | 4                 |             |              | 22  | <b>76.3</b> | 58.5 - 94.0  | 12  | <b>63.7</b> | 36.8 - 90.5  | 7     |             |             | 20   | 68.5                     | 48.2 - 88.8  | 25    | 62.7                     | 43.8 - 81.5  |
| 2000-2004        | 10                | <b>90.5</b> | 72.8 - 100.0 | 110 | <b>89.0</b> | 83.1 - 94.9  | 71  | <b>84.5</b> | 76.1 - 92.9  | 47    | <b>63.9</b> | 50.4 - 77.5 | 131  | <b>77.8</b>              | 70.1 - 85.4  | 107   | <b>80.7</b>              | 72.5 - 89.0  |
| 2005-2009        | 5                 |             |              | 87  | <b>91.0</b> | 85.4 - 96.7  | 66  | <b>94.8</b> | 89.7 - 99.8  | 33    | <b>68.4</b> | 53.8 - 82.9 | 117  | <b>81.4</b>              | 73.9 - 88.9  | 74    | <b>86.0</b>              | 77.8 - 94.1  |

Web-table 2: Precursor-cell lymphoid leukaemia (ICCC3 Ia1) - Five-year net survival (NS, %) by age group and sex: continent, country and calendar period of diagnosis

| Calendar               | Age group (years) |             |              |       |             |              |     |             |              |       |             |             | Sex   |             |              |       |             |              |
|------------------------|-------------------|-------------|--------------|-------|-------------|--------------|-----|-------------|--------------|-------|-------------|-------------|-------|-------------|--------------|-------|-------------|--------------|
|                        | <1                |             |              | 1-4   |             |              | 5-9 |             |              | 10-14 |             |             | Boys  |             |              | Girls |             |              |
|                        | N                 | NS %        | 95% CI       | N     | NS %        | 95% CI       | N   | NS %        | 95% CI       | N     | NS %        | 95% CI      | N     | NS %        | 95% CI       | N     | NS %        | 95% CI       |
| Russia † (Arkhangelsk) |                   |             |              |       |             |              |     |             |              |       |             |             |       |             |              |       |             |              |
| 2000-2004              | 1                 |             |              | 12    | <b>66·7</b> | 41·4 - 92·1  | 3   |             |              | 7     |             |             | 14    | 42·9        | 18·5 - 67·4  | 9     |             |              |
| 2005-2009              |                   |             |              | 11    | <b>80·1</b> | 56·6 - 100·0 | 7   |             |              | 5     |             |             | 14    | 77·1        | 55·1 - 99·1  | 9     |             |              |
| Slovakia *             |                   |             |              |       |             |              |     |             |              |       |             |             |       |             |              |       |             |              |
| 2000-2004              | 4                 |             |              | 59    | <b>88·2</b> | 80·0 - 96·4  | 39  | <b>84·7</b> | 73·5 - 95·8  | 29    | <b>69·1</b> | 52·6 - 85·6 | 69    | <b>85·5</b> | 77·0 - 94·1  | 62    | <b>71·8</b> | 60·1 - 83·6  |
| 2005-2007              | 3                 |             |              | 44    | <b>92·2</b> | 83·8 - 100·0 | 24  | <b>83·9</b> | 69·6 - 98·2  | 18    | <b>60·6</b> | 40·1 - 81·2 | 56    | <b>78·3</b> | 66·9 - 89·8  | 33    | 82·4        | 69·8 - 95·1  |
| Slovenia *             |                   |             |              |       |             |              |     |             |              |       |             |             |       |             |              |       |             |              |
| 1995-1999              | 3                 |             |              | 25    | <b>92·1</b> | 81·6 - 100·0 | 9   |             |              | 13    | <b>77·0</b> | 55·0 - 98·9 | 25    | 76·1        | 59·7 - 92·5  | 25    | 92·0        | 81·6 - 100·0 |
| 2000-2004              | 1                 |             |              | 32    | <b>96·9</b> | 91·0 - 100·0 | 12  | <b>91·7</b> | 76·7 - 100·0 | 4     |             |             | 22    | 95·5        | 87·0 - 100·0 | 27    | 88·9        | 77·3 - 100·0 |
| 2005-2009              | 3                 |             |              | 24    | <b>91·7</b> | 80·9 - 100·0 | 8   |             |              | 8     |             |             | 22    | 81·9        | 66·1 - 97·6  | 21    | 81·8        | 66·0 - 97·6  |
| Spanish registries     |                   |             |              |       |             |              |     |             |              |       |             |             |       |             |              |       |             |              |
| 1995-1999              | 11                | <b>27·4</b> | 3·5 - 51·2   | 142   | <b>85·1</b> | 79·2 - 91·0  | 86  | <b>82·6</b> | 74·6 - 90·6  | 51    | <b>58·9</b> | 45·5 - 72·2 | 168   | <b>74·7</b> | 67·5 - 82·0  | 122   | <b>73·4</b> | 65·0 - 81·7  |
| 2000-2004              | 12                | <b>58·5</b> | 32·0 - 84·9  | 149   | <b>83·2</b> | 77·2 - 89·2  | 79  | <b>84·9</b> | 77·0 - 92·7  | 68    | <b>79·4</b> | 69·8 - 89·0 | 174   | <b>84·4</b> | 78·8 - 90·0  | 134   | <b>78·3</b> | 70·6 - 85·9  |
| 2005-2009              | 14                | <b>85·4</b> | 67·0 - 100·0 | 163   | <b>90·8</b> | 86·4 - 95·3  | 125 | <b>88·4</b> | 82·7 - 94·1  | 60    | <b>73·7</b> | 63·3 - 84·0 | 219   | <b>85·3</b> | 80·1 - 90·5  | 143   | <b>82·6</b> | 75·6 - 89·6  |
| Sweden *               |                   |             |              |       |             |              |     |             |              |       |             |             |       |             |              |       |             |              |
| 1995-1999              | 12                | <b>50·1</b> | 23·4 - 76·7  | 184   | <b>92·9</b> | 89·2 - 96·6  | 95  | <b>85·3</b> | 78·2 - 92·4  | 53    | <b>79·3</b> | 68·5 - 90·1 | 197   | <b>83·9</b> | 78·1 - 89·7  | 147   | <b>87·1</b> | 80·3 - 93·9  |
| 2000-2004              | 10                | <b>50·1</b> | 21·3 - 78·9  | 143   | <b>95·1</b> | 91·6 - 98·7  | 98  | <b>85·7</b> | 78·8 - 92·6  | 62    | <b>82·3</b> | 72·9 - 91·8 | 175   | <b>88·1</b> | 83·1 - 93·1  | 138   | <b>84·4</b> | 77·3 - 91·6  |
| 2005-2009              | 7                 |             |              | 118   | <b>90·0</b> | 84·8 - 95·2  | 61  | <b>85·3</b> | 77·3 - 93·3  | 44    | <b>83·6</b> | 73·9 - 93·4 | 122   | <b>86·0</b> | 80·1 - 91·9  | 108   | <b>85·1</b> | 77·9 - 92·4  |
| Switzerland *          |                   |             |              |       |             |              |     |             |              |       |             |             |       |             |              |       |             |              |
| 1995-1999              | 2                 |             |              | 116   | <b>93·2</b> | 88·5 - 97·8  | 59  | <b>89·8</b> | 82·0 - 97·5  | 43    | <b>74·5</b> | 61·6 - 87·4 | 135   | <b>81·7</b> | 74·7 - 88·8  | 85    | <b>92·8</b> | 86·7 - 98·8  |
| 2000-2004              | 8                 |             |              | 104   | <b>91·4</b> | 86·0 - 96·8  | 72  | <b>88·9</b> | 81·7 - 96·1  | 38    | <b>84·3</b> | 72·8 - 95·7 | 122   | <b>85·8</b> | 78·8 - 92·8  | 100   | <b>88·9</b> | 82·3 - 95·4  |
| 2005-2009              | 9                 |             |              | 113   | <b>89·8</b> | 84·1 - 95·5  | 52  | <b>91·0</b> | 83·5 - 98·5  | 51    | <b>86·7</b> | 76·8 - 96·6 | 127   | <b>89·5</b> | 83·7 - 95·3  | 98    | <b>86·3</b> | 78·8 - 93·9  |
| United Kingdom *       |                   |             |              |       |             |              |     |             |              |       |             |             |       |             |              |       |             |              |
| 1995-1999              | 62                | <b>37·8</b> | 25·8 - 49·9  | 968   | <b>87·9</b> | 85·9 - 90·0  | 531 | <b>84·5</b> | 81·4 - 87·6  | 310   | <b>68·0</b> | 62·8 - 73·2 | 1,038 | <b>78·3</b> | 75·5 - 81·2  | 833   | <b>80·3</b> | 77·0 - 83·5  |
| 2000-2004              | 76                | <b>63·1</b> | 52·3 - 74·0  | 953   | <b>92·1</b> | 90·3 - 93·8  | 569 | <b>89·0</b> | 86·4 - 91·5  | 356   | <b>79·2</b> | 75·0 - 83·5 | 1,115 | <b>85·1</b> | 82·7 - 87·5  | 839   | <b>87·4</b> | 84·8 - 89·9  |
| 2005-2009              | 63                | <b>57·8</b> | 46·5 - 69·1  | 1,001 | <b>93·5</b> | 91·9 - 95·0  | 490 | <b>91·5</b> | 89·2 - 93·9  | 339   | <b>85·1</b> | 81·3 - 88·9 | 1,036 | <b>87·7</b> | 85·4 - 90·0  | 857   | <b>91·2</b> | 89·0 - 93·4  |

Web-table 2: Precursor-cell lymphoid leukaemia (ICCC3 Ia1) - Five-year net survival (NS, %) by age group and sex: continent, country and calendar period of diagnosis

| Calendar              | Age group (years) |             |             |     |             |             |     |             |             |       |             |              | Sex  |             |             |       |             |             |
|-----------------------|-------------------|-------------|-------------|-----|-------------|-------------|-----|-------------|-------------|-------|-------------|--------------|------|-------------|-------------|-------|-------------|-------------|
|                       | <1                |             |             | 1-4 |             |             | 5-9 |             |             | 10-14 |             |              | Boys |             |             | Girls |             |             |
|                       | N                 | NS %        | 95% CI      | N   | NS %        | 95% CI      | N   | NS %        | 95% CI      | N     | NS %        | 95% CI       | N    | NS %        | 95% CI      | N     | NS %        | 95% CI      |
| <b>OCEANIA</b>        |                   |             |             |     |             |             |     |             |             |       |             |              |      |             |             |       |             |             |
| Australian registries |                   |             |             |     |             |             |     |             |             |       |             |              |      |             |             |       |             |             |
| 1995-1999             | 17                | <b>41.3</b> | 19.0 - 63.6 | 340 | <b>88.6</b> | 85.2 - 92.0 | 204 | <b>85.3</b> | 80.5 - 90.2 | 121   | <b>76.9</b> | 69.5 - 84.4  | 363  | <b>80.3</b> | 75.7 - 84.9 | 319   | <b>85.9</b> | 81.6 - 90.2 |
| 2000-2004             | 28                | <b>60.7</b> | 42.9 - 78.5 | 425 | <b>92.0</b> | 89.4 - 94.7 | 235 | <b>84.6</b> | 80.0 - 89.2 | 137   | <b>83.8</b> | 77.6 - 90.0  | 445  | <b>82.5</b> | 78.4 - 86.6 | 380   | <b>90.5</b> | 87.1 - 94.0 |
| 2005-2009             | 12                | <b>62.7</b> | 39.9 - 85.5 | 327 | <b>95.0</b> | 92.7 - 97.3 | 156 | <b>92.1</b> | 88.3 - 96.0 | 122   | <b>81.3</b> | 74.3 - 88.4  | 352  | <b>90.3</b> | 86.8 - 93.7 | 265   | <b>86.6</b> | 81.8 - 91.3 |
| New Zealand *         |                   |             |             |     |             |             |     |             |             |       |             |              |      |             |             |       |             |             |
| 1995-1999             | 4                 |             |             | 89  | <b>90.0</b> | 83.7 - 96.2 | 45  | <b>80.1</b> | 68.5 - 91.6 | 29    | <b>79.4</b> | 64.9 - 93.9  | 104  | <b>85.1</b> | 77.4 - 92.8 | 63    | <b>78.4</b> | 67.1 - 89.6 |
| 2000-2004             | 5                 |             |             | 93  | <b>94.7</b> | 90.1 - 99.2 | 52  | <b>90.4</b> | 82.5 - 98.4 | 32    | <b>75.1</b> | 60.4 - 89.9  | 103  | <b>92.0</b> | 85.7 - 98.3 | 79    | <b>78.8</b> | 69.2 - 88.4 |
| 2005-2009             | 6                 |             |             | 77  | <b>94.8</b> | 89.8 - 99.8 | 62  | <b>87.1</b> | 78.1 - 96.0 | 31    | <b>87.9</b> | 75.3 - 100.0 | 93   | <b>92.5</b> | 86.3 - 98.7 | 83    | <b>86.1</b> | 77.5 - 94.7 |

**Web-table 3**

**Acute myeloid leukaemia (ICCC-3 Ib) - Five-year net survival (NS, %) by age group and sex: continent, country and calendar period of diagnosis**

Net survival estimates by sex were age-standardised where possible. Estimates in italics are not age-standardised

\* National coverage – the data are derived from a population-based cancer registry (registries) covering the entire country

<sup>M</sup> Estimate based on merging data for 2 (or all 3) calendar periods

<sup>R</sup> Age-standardised estimate computed by pooling two age-specific estimates and re-estimation

<sup>§</sup> Estimate judged as less reliable

<sup>‡</sup> Korea: Republic of Korea; Russia: Russian Federation

Web-table 3: Acute myeloid leukaemia (ICCC3 Ib) - Five-year net survival (NS, %) by age group and sex: continent, country and calendar period of diagnosis

| Calendar                           | Age group (years) |      |        |     |      |            |     |      |             |       |      |             | Sex  |                   |             |       |      |             |
|------------------------------------|-------------------|------|--------|-----|------|------------|-----|------|-------------|-------|------|-------------|------|-------------------|-------------|-------|------|-------------|
|                                    | <1                |      |        | 1-4 |      |            | 5-9 |      |             | 10-14 |      |             | Boys |                   |             | Girls |      |             |
|                                    | N                 | NS % | 95% CI | N   | NS % | 95% CI     | N   | NS % | 95% CI      | N     | NS % | 95% CI      | N    | NS %              | 95% CI      | N     | NS % | 95% CI      |
| <b>AFRICA</b>                      |                   |      |        |     |      |            |     |      |             |       |      |             |      |                   |             |       |      |             |
| Algerian registries                |                   |      |        |     |      |            |     |      |             |       |      |             |      |                   |             |       |      |             |
| 2000-2004                          | 2                 |      |        | 3   |      |            | 5   |      |             | 3     |      |             | 11   | 16.0 <sup>§</sup> | 0.0 - 38.0  | 2     |      |             |
| 2005-2009                          | 1                 |      |        | 4   |      |            | 1   |      |             | 1     |      |             | 3    |                   |             | 4     |      |             |
| Libya (Benghazi)                   |                   |      |        |     |      |            |     |      |             |       |      |             |      |                   |             |       |      |             |
| 2003-2004                          |                   |      |        | 5   |      |            |     |      |             |       |      |             | 1    |                   |             | 4     |      |             |
| Tunisia (Central)                  |                   |      |        |     |      |            |     |      |             |       |      |             |      |                   |             |       |      |             |
| 1996-1999                          |                   |      |        | 2   |      |            | 1   |      |             |       |      |             | 2    |                   |             | 1     |      |             |
| 2000-2004                          | 1                 |      |        |     |      |            | 1   |      |             |       |      |             | 2    |                   |             |       |      |             |
| 2005-2007                          |                   |      |        | 2   |      |            |     |      |             | 1     |      |             | 2    |                   |             | 1     |      |             |
| <b>AMERICA (Central and South)</b> |                   |      |        |     |      |            |     |      |             |       |      |             |      |                   |             |       |      |             |
| Brazilian registries               |                   |      |        |     |      |            |     |      |             |       |      |             |      |                   |             |       |      |             |
| 1996-1999                          | 1                 |      |        | 5   |      |            | 4   |      |             | 3     |      |             | 7    |                   |             | 6     |      |             |
| 2000-2004                          | 5                 |      |        | 11  | 27.4 | 3.7 - 51.1 | 15  | 66.7 | 43.8 - 89.6 | 10    | 40.1 | 12.2 - 68.0 | 28   | 45.4 <sup>R</sup> | 33.0 - 57.8 | 13    | 54.1 | 28.3 - 79.9 |
| 2005-2009                          | 3                 |      |        | 5   |      |            | 8   |      |             | 9     |      |             | 17   | 47.0              | 27.3 - 66.7 | 8     |      |             |
| Chilean registries                 |                   |      |        |     |      |            |     |      |             |       |      |             |      |                   |             |       |      |             |
| 1998-1999                          |                   |      |        | 2   |      |            |     |      |             | 1     |      |             | 2    |                   |             | 1     |      |             |
| 2000-2004                          |                   |      |        |     |      |            |     |      |             | 2     |      |             | 2    |                   |             |       |      |             |
| 2005-2008                          | 1                 |      |        | 4   |      |            | 3   |      |             | 1     |      |             | 8    |                   |             | 1     |      |             |
| Ecuador (Quito)                    |                   |      |        |     |      |            |     |      |             |       |      |             |      |                   |             |       |      |             |
| 1995-1999                          | 3                 |      |        | 5   |      |            | 12  | 41.7 | 15.7 - 67.7 | 13    | 46.3 | 20.7 - 71.9 | 16   | 62.9              | 40.0 - 85.8 | 17    | 35.5 | 14.1 - 57.0 |
| 2000-2004                          | 2                 |      |        | 5   |      |            | 4   |      |             | 7     |      |             | 10   | 50.3              | 21.4 - 79.1 | 8     |      |             |
| 2005-2009                          | 3                 |      |        | 7   |      |            | 1   |      |             | 5     |      |             | 8    |                   |             | 8     |      |             |
| Puerto Rico *                      |                   |      |        |     |      |            |     |      |             |       |      |             |      |                   |             |       |      |             |
| 2000-2004                          | 1                 |      |        | 4   |      |            | 6   |      |             | 6     |      |             | 10   | 60.1              | 31.6 - 88.5 | 7     |      |             |
| 2005-2009                          | 2                 |      |        | 5   |      |            | 4   |      |             | 7     |      |             | 8    |                   |             | 10    | 44.4 | 16.9 - 71.8 |

Web-table 3: Acute myeloid leukaemia (ICCC3 Ib) - Five-year net survival (NS, %) by age group and sex: continent, country and calendar period of diagnosis

| Calendar               | Age group (years) |             |             |     |             |             |     |             |              |       |             |             | Sex  |                         |             |       |                         |             |
|------------------------|-------------------|-------------|-------------|-----|-------------|-------------|-----|-------------|--------------|-------|-------------|-------------|------|-------------------------|-------------|-------|-------------------------|-------------|
|                        | <1                |             |             | 1-4 |             |             | 5-9 |             |              | 10-14 |             |             | Boys |                         |             | Girls |                         |             |
|                        | N                 | NS %        | 95% CI      | N   | NS %        | 95% CI      | N   | NS %        | 95% CI       | N     | NS %        | 95% CI      | N    | NS %                    | 95% CI      | N     | NS %                    | 95% CI      |
| <b>AMERICA (North)</b> |                   |             |             |     |             |             |     |             |              |       |             |             |      |                         |             |       |                         |             |
| Canada *               |                   |             |             |     |             |             |     |             |              |       |             |             |      |                         |             |       |                         |             |
| 1995-1999              | 31                | <b>61.6</b> | 44.8 - 78.5 | 80  | <b>56.3</b> | 45.5 - 67.1 | 51  | <b>56.9</b> | 43.5 - 70.3  | 73    | <b>53.5</b> | 42.2 - 64.8 | 118  | <b>53.9</b>             | 44.7 - 63.1 | 117   | <b>58.0</b>             | 48.8 - 67.2 |
| 2000-2004              | 28                | <b>57.4</b> | 39.6 - 75.2 | 58  | <b>69.0</b> | 57.3 - 80.8 | 48  | <b>56.3</b> | 42.5 - 70.1  | 54    | <b>70.4</b> | 58.4 - 82.5 | 85   | <b>65.9</b>             | 55.9 - 75.9 | 103   | <b>63.5</b>             | 53.9 - 73.0 |
| 2005-2009              | 26                | <b>69.2</b> | 51.4 - 86.9 | 67  | <b>78.8</b> | 68.6 - 89.1 | 42  | <b>68.9</b> | 55.4 - 82.3  | 65    | <b>70.3</b> | 58.4 - 82.1 | 110  | <b>70.5</b>             | 61.2 - 79.8 | 90    | <b>74.3</b>             | 65.2 - 83.4 |
| US registries          |                   |             |             |     |             |             |     |             |              |       |             |             |      |                         |             |       |                         |             |
| 1995-1999              | 193               | <b>45.4</b> | 38.3 - 52.5 | 547 | <b>54.4</b> | 50.2 - 58.6 | 336 | <b>55.7</b> | 50.4 - 61.0  | 498   | <b>46.9</b> | 42.5 - 51.3 | 854  | <b>52.1</b>             | 48.6 - 55.7 | 720   | <b>50.7</b>             | 46.9 - 54.5 |
| 2000-2004              | 262               | <b>57.6</b> | 51.6 - 63.6 | 602 | <b>62.6</b> | 58.8 - 66.5 | 369 | <b>60.4</b> | 55.4 - 65.4  | 566   | <b>57.7</b> | 53.6 - 61.8 | 976  | <b>59.9</b>             | 56.6 - 63.2 | 823   | <b>59.6</b>             | 56.1 - 63.1 |
| 2005-2009              | 295               | <b>60.6</b> | 55.0 - 66.2 | 650 | <b>66.2</b> | 62.5 - 69.9 | 354 | <b>63.5</b> | 58.5 - 68.5  | 599   | <b>61.8</b> | 57.9 - 65.7 | 976  | <b>63.3</b>             | 60.1 - 66.6 | 922   | <b>63.1</b>             | 59.7 - 66.5 |
| <b>ASIA</b>            |                   |             |             |     |             |             |     |             |              |       |             |             |      |                         |             |       |                         |             |
| Chinese registries     |                   |             |             |     |             |             |     |             |              |       |             |             |      |                         |             |       |                         |             |
| 1995-1999              |                   |             |             | 6   |             |             | 10  | <b>10.0</b> | 0.0 - 24.5   | 11    | <b>0.0</b>  |             | 18   | 5.6                     | 0.0 - 13.9  | 9     |                         |             |
| 2000-2004              | 2                 |             |             | 8   |             |             | 18  | <b>27.5</b> | 6.4 - 48.6   | 33    | <b>15.2</b> | 3.6 - 26.7  | 39   | <b>15.9<sup>R</sup></b> | 6.9 - 24.8  | 22    | 26.0                    | 8.3 - 43.8  |
| 2005-2009              | 3                 |             |             | 13  | <b>33.0</b> | 6.5 - 59.6  | 20  | <b>46.0</b> | 22.5 - 69.5  | 25    | <b>39.5</b> | 19.7 - 59.2 | 36   | <b>38.8</b>             | 22.5 - 55.1 | 25    | 44.0                    | 24.2 - 63.8 |
| Cyprus *               |                   |             |             |     |             |             |     |             |              |       |             |             |      |                         |             |       |                         |             |
| 2004-2009              | 1                 |             |             | 2   |             |             | 2   |             |              | 5     |             |             | 6    |                         |             | 4     |                         |             |
| India (Karunagappally) |                   |             |             |     |             |             |     |             |              |       |             |             |      |                         |             |       |                         |             |
| 1995-1999              |                   |             |             |     |             |             |     |             |              | 1     |             |             | 1    |                         |             |       |                         |             |
| 2000-2004              |                   |             |             |     |             |             | 2   |             |              | 2     |             |             | 1    |                         |             | 3     |                         |             |
| 2005-2009              |                   |             |             | 1   |             |             | 1   |             |              | 1     |             |             | 3    |                         |             |       |                         |             |
| Indonesia (Jakarta)    |                   |             |             |     |             |             |     |             |              |       |             |             |      |                         |             |       |                         |             |
| 2005-2007              |                   |             |             |     |             |             | 3   |             |              | 3     |             |             | 3    |                         |             | 3     |                         |             |
| Israel *               |                   |             |             |     |             |             |     |             |              |       |             |             |      |                         |             |       |                         |             |
| 1995-1999              | 2                 |             |             | 13  | <b>53.9</b> | 28.2 - 79.6 | 9   |             |              | 16    | <b>56.3</b> | 33.0 - 79.6 | 26   | <b>61.7<sup>R</sup></b> | 47.4 - 76.1 | 14    | 64.3                    | 40.3 - 88.3 |
| 2000-2004              | 8                 |             |             | 20  | <b>70.1</b> | 50.8 - 89.4 | 14  | <b>78.6</b> | 57.9 - 99.2  | 25    | <b>56.0</b> | 37.1 - 75.0 | 30   | <b>70.4<sup>R</sup></b> | 57.7 - 83.1 | 37    | <b>63.5</b>             | 49.5 - 77.6 |
| 2005-2009              | 11                | <b>54.7</b> | 27.0 - 82.4 | 28  | <b>65.3</b> | 47.2 - 83.3 | 16  | <b>83.6</b> | 67.1 - 100.0 | 23    | <b>53.2</b> | 33.5 - 72.8 | 41   | <b>64.0<sup>R</sup></b> | 51.6 - 76.3 | 37    | <b>66.0<sup>R</sup></b> | 54.5 - 77.5 |

Web-table 3: Acute myeloid leukaemia (ICCC3 Ib) - Five-year net survival (NS, %) by age group and sex: continent, country and calendar period of diagnosis

| Calendar            | Age group (years) |             |             |     |             |             |     |             |             |       |             |             | Sex  |             |             |       |                          |             |
|---------------------|-------------------|-------------|-------------|-----|-------------|-------------|-----|-------------|-------------|-------|-------------|-------------|------|-------------|-------------|-------|--------------------------|-------------|
|                     | <1                |             |             | 1-4 |             |             | 5-9 |             |             | 10-14 |             |             | Boys |             |             | Girls |                          |             |
|                     | N                 | NS %        | 95% CI      | N   | NS %        | 95% CI      | N   | NS %        | 95% CI      | N     | NS %        | 95% CI      | N    | NS %        | 95% CI      | N     | NS %                     | 95% CI      |
| Japanese registries |                   |             |             |     |             |             |     |             |             |       |             |             |      |             |             |       |                          |             |
| 1995-1999           | 19                | <b>62.9</b> | 41.7 - 84.2 | 27  | <b>55.6</b> | 37.3 - 73.9 | 28  | <b>67.9</b> | 51.0 - 84.8 | 48    | <b>60.5</b> | 46.8 - 74.1 | 71   | <b>61.4</b> | 50.4 - 72.4 | 51    | <b>62.3</b> <sup>R</sup> | 51.9 - 72.7 |
| 2000-2004           | 24                | <b>72.9</b> | 54.7 - 91.1 | 69  | <b>69.0</b> | 57.8 - 80.2 | 48  | <b>56.9</b> | 42.6 - 71.3 | 40    | <b>56.7</b> | 41.4 - 71.9 | 96   | <b>63.3</b> | 53.1 - 73.6 | 85    | <b>59.1</b>              | 47.8 - 70.5 |
| 2005-2009           | 13                | <b>70.8</b> | 50.0 - 91.7 | 37  | <b>76.2</b> | 64.8 - 87.5 | 31  | <b>62.9</b> | 49.1 - 76.6 | 30    | <b>70.3</b> | 55.8 - 84.8 | 57   | <b>73.7</b> | 64.2 - 83.3 | 54    | <b>65.7</b>              | 54.8 - 76.7 |
| Korea * †           |                   |             |             |     |             |             |     |             |             |       |             |             |      |             |             |       |                          |             |
| 1995-1999           | 44                | <b>22.8</b> | 10.8 - 34.9 | 151 | <b>45.8</b> | 37.8 - 53.7 | 120 | <b>44.2</b> | 35.4 - 53.0 | 167   | <b>35.4</b> | 28.2 - 42.6 | 283  | <b>39.9</b> | 34.1 - 45.6 | 199   | <b>40.3</b>              | 33.4 - 47.1 |
| 2000-2004           | 37                | <b>51.5</b> | 35.7 - 67.4 | 146 | <b>48.0</b> | 39.9 - 56.1 | 149 | <b>51.0</b> | 43.1 - 59.0 | 172   | <b>49.5</b> | 42.0 - 56.9 | 283  | <b>46.4</b> | 40.6 - 52.1 | 221   | <b>53.8</b>              | 47.2 - 60.4 |
| 2005-2009           | 49                | <b>47.4</b> | 33.6 - 61.2 | 95  | <b>55.5</b> | 46.0 - 65.1 | 117 | <b>53.7</b> | 45.0 - 62.5 | 172   | <b>55.5</b> | 48.2 - 62.8 | 243  | <b>53.4</b> | 47.3 - 59.6 | 190   | <b>54.4</b>              | 47.4 - 61.3 |
| Malaysia (Penang)   |                   |             |             |     |             |             |     |             |             |       |             |             |      |             |             |       |                          |             |
| 1995-1999           | 1                 |             |             | 10  | <b>60.0</b> | 31.6 - 88.5 | 4   |             |             | 7     |             |             | 13   | 53.9        | 28.2 - 79.6 | 9     |                          |             |
| 2000-2004           | 2                 |             |             | 9   |             |             | 8   |             |             | 4     |             |             | 14   | 71.5        | 48.8 - 94.2 | 9     |                          |             |
| 2005-2009           | 3                 |             |             | 7   |             |             | 8   |             |             | 4     |             |             | 8    |             |             | 14    | 33.5                     | 10.3 - 56.7 |
| Mongolia *          |                   |             |             |     |             |             |     |             |             |       |             |             |      |             |             |       |                          |             |
| 2005-2009           |                   |             |             | 3   |             |             | 2   |             |             | 3     |             |             | 3    |             |             | 5     |                          |             |
| Taiwan *            |                   |             |             |     |             |             |     |             |             |       |             |             |      |             |             |       |                          |             |
| 1995-1999           | 31                | <b>32.4</b> | 16.4 - 48.4 | 53  | <b>41.6</b> | 28.5 - 54.6 | 46  | <b>45.7</b> | 31.5 - 59.8 | 65    | <b>38.5</b> | 26.8 - 50.2 | 102  | <b>40.0</b> | 30.2 - 49.7 | 93    | <b>42.1</b>              | 32.1 - 52.1 |
| 2000-2004           | 21                | <b>38.3</b> | 18.3 - 58.3 | 71  | <b>49.3</b> | 37.8 - 60.9 | 49  | <b>51.0</b> | 37.3 - 64.8 | 73    | <b>48.0</b> | 36.7 - 59.4 | 122  | <b>47.9</b> | 39.0 - 56.9 | 92    | <b>49.7</b>              | 39.6 - 59.8 |
| 2005-2009           | 23                | <b>52.8</b> | 33.8 - 71.9 | 56  | <b>60.3</b> | 47.6 - 73.1 | 59  | <b>60.3</b> | 47.8 - 72.8 | 67    | <b>48.7</b> | 37.0 - 60.4 | 116  | <b>56.3</b> | 47.4 - 65.1 | 89    | <b>54.2</b>              | 43.9 - 64.4 |
| Thai registries     |                   |             |             |     |             |             |     |             |             |       |             |             |      |             |             |       |                          |             |
| 1995-1999           | 3                 |             |             | 5   |             |             | 5   |             |             | 5     |             |             | 9    |             |             | 9     |                          |             |
| 2000-2004           | 1                 |             |             | 8   |             |             | 11  | <b>36.5</b> | 10.3 - 62.7 | 11    | <b>31.2</b> | 5.2 - 57.3  | 18   | 36.0        | 14.3 - 57.7 | 13    | 23.1                     | 2.4 - 43.9  |
| 2005-2009           | 7                 |             |             | 12  | <b>17.9</b> | 0.0 - 37.5  | 6   |             |             | 11    | <b>57.1</b> | 30.0 - 84.2 | 18   | 35.5        | 15.1 - 55.9 | 18    | 53.1                     | 28.2 - 78.0 |
| Turkey (Izmir)      |                   |             |             |     |             |             |     |             |             |       |             |             |      |             |             |       |                          |             |
| 1995-1999           | 7                 |             |             | 7   |             |             | 13  | <b>61.6</b> | 36.4 - 86.7 | 7     |             |             | 16   | 43.8        | 20.7 - 67.0 | 18    | 75.2                     | 54.7 - 95.8 |
| 2000-2004           | 2                 |             |             | 8   |             |             | 8   |             |             | 6     |             |             | 14   | 39.8        | 14.8 - 64.8 | 10    | 20.1                     | 0.0 - 41.6  |
| 2005-2009           | 4                 |             |             | 6   |             |             | 4   |             |             | 14    | <b>35.8</b> | 12.3 - 59.3 | 15   | 47.1        | 21.2 - 73.0 | 13    | 40.0                     | 13.2 - 66.7 |

Web-table 3: Acute myeloid leukaemia (ICCC3 Ib) - Five-year net survival (NS, %) by age group and sex: continent, country and calendar period of diagnosis

| Calendar      | Age group (years) |                         |             |     |                         |              |     |                         |             |       |                         |             | Sex  |                         |              |       |                         |              |
|---------------|-------------------|-------------------------|-------------|-----|-------------------------|--------------|-----|-------------------------|-------------|-------|-------------------------|-------------|------|-------------------------|--------------|-------|-------------------------|--------------|
|               | <1                |                         |             | 1-4 |                         |              | 5-9 |                         |             | 10-14 |                         |             | Boys |                         |              | Girls |                         |              |
|               | N                 | NS %                    | 95% CI      | N   | NS %                    | 95% CI       | N   | NS %                    | 95% CI      | N     | NS %                    | 95% CI      | N    | NS %                    | 95% CI       | N     | NS %                    | 95% CI       |
| <b>EUROPE</b> |                   |                         |             |     |                         |              |     |                         |             |       |                         |             |      |                         |              |       |                         |              |
| Austria *     |                   |                         |             |     |                         |              |     |                         |             |       |                         |             |      |                         |              |       |                         |              |
| 1995-1999     | 1                 |                         |             | 21  | <b>61·9</b>             | 41·8 - 82·1  | 4   |                         |             | 21    | <b>57·2</b>             | 36·8 - 77·6 | 29   | <b>58·7<sup>R</sup></b> | 44·9 - 72·5  | 18    | 61·1                    | 39·5 - 82·7  |
| 2000-2004     | 6                 |                         |             | 10  | <b>60·0</b>             | 31·6 - 88·4  | 9   |                         |             | 15    | <b>66·7</b>             | 43·8 - 89·6 | 21   | 66·8                    | 47·2 - 86·4  | 19    | 63·2                    | 42·2 - 84·2  |
| 2005-2009     | 2                 |                         |             | 12  | <b>77·8</b>             | 52·3 - 100·0 | 9   |                         |             | 12    | <b>66·4</b>             | 43·4 - 89·4 | 16   | 87·6                    | 71·9 - 100·0 | 19    | 59·7                    | 38·8 - 80·5  |
| Belgium *     |                   |                         |             |     |                         |              |     |                         |             |       |                         |             |      |                         |              |       |                         |              |
| 2004-2009     | 10                | <b>53·5<sup>M</sup></b> | 22·0 - 85·0 | 24  | <b>42·2<sup>M</sup></b> | 20·6 - 63·9  | 17  | <b>63·7<sup>M</sup></b> | 39·2 - 88·3 | 17    | <b>60·2<sup>M</sup></b> | 35·9 - 84·5 | 31   | 48·5 <sup>M</sup>       | 29·4 - 67·7  | 37    | <b>58·5<sup>M</sup></b> | 44·5 - 72·6  |
| Bulgaria *    |                   |                         |             |     |                         |              |     |                         |             |       |                         |             |      |                         |              |       |                         |              |
| 1995-1999     | 1                 |                         |             | 9   |                         |              | 8   |                         |             | 10    | <b>50·1</b>             | 21·3 - 78·9 | 17   | 23·6                    | 4·9 - 42·3   | 11    | 36·4                    | 10·2 - 62·6  |
| 2000-2004     | 4                 |                         |             | 10  | <b>30·1</b>             | 4·5 - 55·7   | 7   |                         |             | 14    | <b>21·5</b>             | 2·0 - 41·0  | 23   | 30·5                    | 12·5 - 48·5  | 12    | 8·4                     | 0·0 - 20·7   |
| 2005-2009     | 3                 |                         |             | 8   |                         |              | 10  | <b>33·8</b>             | 6·0 - 61·6  | 12    | <b>46·5</b>             | 18·3 - 74·7 | 16   | 34·1                    | 14·6 - 53·6  | 17    | 24·7                    | 2·4 - 46·9   |
| Croatia *     |                   |                         |             |     |                         |              |     |                         |             |       |                         |             |      |                         |              |       |                         |              |
| 1998-1999     | 1                 |                         |             | 7   |                         |              | 2   |                         |             | 3     |                         |             | 8    |                         |              | 5     |                         |              |
| 2000-2004     | 2                 |                         |             | 7   |                         |              | 7   |                         |             | 4     |                         |             | 13   | 61·6                    | 36·4 - 86·7  | 7     |                         |              |
| 2005-2009     | 2                 |                         |             | 12  | <b>64·4</b>             | 37·8 - 91·0  | 7   |                         |             | 7     |                         |             | 15   | 53·2                    | 28·5 - 78·0  | 13    | 58·4                    | 32·0 - 84·7  |
| Denmark *     |                   |                         |             |     |                         |              |     |                         |             |       |                         |             |      |                         |              |       |                         |              |
| 1995-1999     | 4                 |                         |             | 11  | <b>72·8</b>             | 48·8 - 96·7  | 8   |                         |             | 9     |                         |             | 13   | 53·9                    | 28·7 - 79·0  | 19    | 63·2                    | 42·2 - 84·2  |
| 2000-2004     | 7                 |                         |             | 22  | <b>68·2</b>             | 49·3 - 87·1  | 5   |                         |             | 8     |                         |             | 19   | 63·2                    | 42·2 - 84·2  | 23    | 74·0                    | 56·6 - 91·3  |
| 2005-2009     | 6                 |                         |             | 18  | <b>83·8</b>             | 67·4 - 100·0 | 9   |                         |             | 5     |                         |             | 17   | 63·2                    | 40·7 - 85·7  | 21    | 73·0                    | 55·3 - 90·7  |
| Estonia *     |                   |                         |             |     |                         |              |     |                         |             |       |                         |             |      |                         |              |       |                         |              |
| 1995-1999     |                   |                         |             | 1   |                         |              | 2   |                         |             | 4     |                         |             | 6    |                         |              | 1     |                         |              |
| 2000-2004     | 2                 |                         |             |     |                         |              | 1   |                         |             | 8     |                         |             | 6    |                         |              | 5     |                         |              |
| 2005-2008     | 3                 |                         |             | 2   |                         |              |     |                         |             | 1     |                         |             | 3    |                         |              | 3     |                         |              |
| Finland *     |                   |                         |             |     |                         |              |     |                         |             |       |                         |             |      |                         |              |       |                         |              |
| 1995-1999     | 4                 |                         |             | 15  | <b>86·7</b>             | 70·1 - 100·0 | 9   |                         |             | 9     |                         |             | 19   | 68·5                    | 48·2 - 88·7  | 18    | 88·9                    | 74·8 - 100·0 |
| 2000-2004     | 4                 |                         |             | 10  | <b>70·0</b>             | 43·3 - 96·8  | 3   |                         |             | 12    | <b>66·7</b>             | 41·4 - 92·1 | 15   | 53·4                    | 29·3 - 77·5  | 14    | 78·6                    | 58·0 - 99·3  |
| 2005-2009     | 3                 |                         |             | 15  | <b>75·5</b>             | 55·3 - 95·6  | 9   |                         |             | 8     |                         |             | 16   | 73·7                    | 52·4 - 95·1  | 19    | 66·5                    | 46·9 - 86·1  |

Web-table 3: Acute myeloid leukaemia (ICCC3 Ib) - Five-year net survival (NS, %) by age group and sex: continent, country and calendar period of diagnosis

| Calendar           | Age group (years) |             |             |     |             |             |     |             |             |       |             |             | Sex  |             |                    |       |                          |                    |
|--------------------|-------------------|-------------|-------------|-----|-------------|-------------|-----|-------------|-------------|-------|-------------|-------------|------|-------------|--------------------|-------|--------------------------|--------------------|
|                    | <1                |             |             | 1-4 |             |             | 5-9 |             |             | 10-14 |             |             | Boys |             |                    | Girls |                          |                    |
|                    | N                 | NS %        | 95% CI      | N   | NS %        | 95% CI      | N   | NS %        | 95% CI      | N     | NS %        | 95% CI      | N    | NS %        | 95% CI             | N     | NS %                     | 95% CI             |
| France *           |                   |             |             |     |             |             |     |             |             |       |             |             |      |             |                    |       |                          |                    |
| 1995-1999          | 61                | <b>55.9</b> | 43.6 - 68.3 | 120 | <b>67.6</b> | 59.2 - 75.9 | 89  | <b>66.0</b> | 56.2 - 75.9 | 110   | <b>51.0</b> | 41.7 - 60.3 | 187  | <b>58.2</b> | 51.0 - 65.3        | 193   | <b>62.5</b>              | 55.4 - 69.7        |
| 2000-2004          | 56                | <b>47.7</b> | 34.7 - 60.7 | 127 | <b>52.0</b> | 43.4 - 60.6 | 87  | <b>79.3</b> | 70.9 - 87.8 | 122   | <b>57.2</b> | 48.4 - 66.0 | 201  | <b>65.4</b> | 59.1 - 71.7        | 191   | <b>59.1</b>              | 52.1 - 66.1        |
| 2005-2009          | 51                | <b>72.8</b> | 60.6 - 85.0 | 109 | <b>57.1</b> | 48.1 - 66.1 | 75  | <b>83.2</b> | 74.9 - 91.5 | 102   | <b>63.1</b> | 53.6 - 72.6 | 175  | <b>68.6</b> | 61.8 - 75.3        | 162   | <b>70.5</b>              | 63.6 - 77.5        |
| German registries  |                   |             |             |     |             |             |     |             |             |       |             |             |      |             |                    |       |                          |                    |
| 1995-1999          | 15                | <b>59.5</b> | 35.3 - 83.7 | 25  | <b>68.1</b> | 50.2 - 85.9 | 27  | <b>66.7</b> | 49.4 - 84.0 | 40    | <b>52.5</b> | 37.4 - 67.7 | 49   | <b>54.7</b> | 42.0 - 67.4        | 58    | <b>69.9</b>              | 58.5 - 81.2        |
| 2000-2004          | 19                | <b>63.4</b> | 42.3 - 84.4 | 37  | <b>78.4</b> | 65.4 - 91.5 | 27  | <b>74.1</b> | 57.9 - 90.3 | 56    | <b>65.6</b> | 53.2 - 78.0 | 77   | <b>70.6</b> | 60.6 - 80.6        | 62    | <b>70.4</b>              | 58.5 - 82.4        |
| 2005-2009          | 31                | <b>59.6</b> | 41.4 - 77.9 | 62  | <b>85.3</b> | 75.8 - 94.8 | 38  | <b>84.0</b> | 72.4 - 95.6 | 59    | <b>73.7</b> | 62.8 - 84.7 | 107  | <b>76.0</b> | 67.7 - 84.4        | 83    | <b>80.8</b>              | 71.8 - 89.7        |
| Iceland *          |                   |             |             |     |             |             |     |             |             |       |             |             |      |             |                    |       |                          |                    |
| 2000-2004          |                   |             |             | 1   |             |             | 1   |             |             |       |             |             |      |             |                    | 2     |                          |                    |
| 2005-2009          |                   |             |             | 1   |             |             |     |             | 3           |       |             |             | 2    |             |                    | 2     |                          |                    |
| Ireland *          |                   |             |             |     |             |             |     |             |             |       |             |             |      |             |                    |       |                          |                    |
| 1995-1999          | 2                 |             |             | 11  | <b>63.7</b> | 36.8 - 90.5 | 7   |             |             | 9     |             |             | 14   | <i>71.5</i> | <i>48.8 - 94.2</i> | 15    | <i>60.0</i>              | <i>36.3 - 83.8</i> |
| 2000-2004          | 5                 |             |             | 14  | <b>78.6</b> | 58.0 - 99.3 | 9   |             |             | 7     |             |             | 15   | <i>60.0</i> | <i>36.3 - 83.8</i> | 20    | <i>60.1</i>              | <i>39.3 - 80.8</i> |
| 2005-2009          | 7                 |             |             | 13  | <b>64.4</b> | 40.4 - 88.3 | 7   |             |             | 8     |             |             | 19   | <i>69.2</i> | <i>49.3 - 89.2</i> | 16    | <i>62.7</i>              | <i>41.6 - 83.8</i> |
| Italian registries |                   |             |             |     |             |             |     |             |             |       |             |             |      |             |                    |       |                          |                    |
| 1995-1999          | 17                | <b>51.1</b> | 28.4 - 73.8 | 30  | <b>61.6</b> | 44.1 - 79.1 | 25  | <b>68.0</b> | 50.2 - 85.8 | 37    | <b>56.8</b> | 41.1 - 72.5 | 52   | <b>58.4</b> | 45.2 - 71.5        | 57    | <b>64.7</b>              | 52.6 - 76.7        |
| 2000-2004          | 7                 |             |             | 39  | <b>66.4</b> | 51.8 - 81.1 | 32  | <b>74.3</b> | 59.2 - 89.4 | 46    | <b>67.5</b> | 54.1 - 80.8 | 72   | <b>66.7</b> | 56.2 - 77.2        | 52    | <b>67.2</b>              | 54.8 - 79.6        |
| 2005-2009          | 13                | <b>50.6</b> | 23.5 - 77.7 | 25  | <b>76.0</b> | 60.8 - 91.2 | 26  | <b>69.2</b> | 52.7 - 85.6 | 39    | <b>69.9</b> | 56.4 - 83.3 | 65   | <b>76.6</b> | 66.7 - 86.6        | 38    | <b>58.3</b> <sup>R</sup> | 47.4 - 69.2        |
| Latvia *           |                   |             |             |     |             |             |     |             |             |       |             |             |      |             |                    |       |                          |                    |
| 1995-1999          | 1                 |             |             | 4   |             |             | 6   |             |             | 4     |             |             | 7    |             |                    | 8     |                          |                    |
| 2000-2004          |                   |             |             | 2   |             |             | 3   |             |             | 6     |             |             | 7    |             |                    | 4     |                          |                    |
| 2005-2009          | 2                 |             |             | 2   |             |             | 5   |             |             |       |             |             | 6    |             |                    | 3     |                          |                    |
| Lithuania *        |                   |             |             |     |             |             |     |             |             |       |             |             |      |             |                    |       |                          |                    |
| 1995-1999          | 3                 |             |             | 1   |             |             | 3   |             |             | 5     |             |             | 7    |             |                    | 5     |                          |                    |
| 2000-2004          | 1                 |             |             | 11  | <b>9.1</b>  | 0.0 - 22.4  | 8   |             |             | 7     |             |             | 15   | <i>26.7</i> | <i>6.0 - 47.5</i>  | 12    | <i>16.7</i>              | <i>0.0 - 35.0</i>  |
| 2005-2009          | 2                 |             |             | 4   |             |             | 2   |             |             | 6     |             |             | 7    |             |                    | 7     |                          |                    |

Web-table 3: Acute myeloid leukaemia (ICCC3 Ib) - Five-year net survival (NS, %) by age group and sex: continent, country and calendar period of diagnosis

| Calendar                  | Age group (years) |             |             |     |             |             |     |             |              |       |             |             | Sex  |                          |                    |       |                          |                     |
|---------------------------|-------------------|-------------|-------------|-----|-------------|-------------|-----|-------------|--------------|-------|-------------|-------------|------|--------------------------|--------------------|-------|--------------------------|---------------------|
|                           | <1                |             |             | 1-4 |             |             | 5-9 |             |              | 10-14 |             |             | Boys |                          |                    | Girls |                          |                     |
|                           | N                 | NS %        | 95% CI      | N   | NS %        | 95% CI      | N   | NS %        | 95% CI       | N     | NS %        | 95% CI      | N    | NS %                     | 95% CI             | N     | NS %                     | 95% CI              |
| <b>Malta *</b>            |                   |             |             |     |             |             |     |             |              |       |             |             |      |                          |                    |       |                          |                     |
| 2000-2004                 |                   |             |             | 1   |             |             | 3   |             |              |       |             | 3           |      |                          | 1                  |       |                          |                     |
| 2005-2009                 | 1                 |             |             |     |             |             | 1   |             |              | 2     |             |             | 2    |                          |                    |       |                          | 2                   |
| <b>Netherlands *</b>      |                   |             |             |     |             |             |     |             |              |       |             |             |      |                          |                    |       |                          |                     |
| 1995-1999                 | 9                 |             |             | 39  | <b>71·8</b> | 57·9 - 85·8 | 18  | <b>55·6</b> | 33·5 - 77·7  | 26    | <b>57·7</b> | 39·3 - 76·2 | 48   | <b>57·9</b>              | 43·7 - 72·2        | 44    | <b>59·1</b> <sup>R</sup> | 47·5 - 70·6         |
| 2000-2004                 | 12                | <b>50·1</b> | 23·5 - 76·8 | 43  | <b>62·8</b> | 48·6 - 77·0 | 17  | <b>47·1</b> | 24·6 - 69·6  | 37    | <b>54·1</b> | 38·4 - 69·8 | 66   | <b>61·0</b> <sup>R</sup> | 51·7 - 70·2        | 43    | <b>49·1</b> <sup>R</sup> | 37·3 - 60·9         |
| 2005-2009                 | 18                | <b>51·4</b> | 29·7 - 73·0 | 38  | <b>57·8</b> | 42·3 - 73·4 | 22  | <b>57·4</b> | 34·1 - 80·6  | 28    | <b>62·5</b> | 46·1 - 78·9 | 63   | <b>59·9</b>              | 47·9 - 71·9        | 43    | <b>62·7</b> <sup>R</sup> | 50·9 - 74·5         |
| <b>Norway *</b>           |                   |             |             |     |             |             |     |             |              |       |             |             |      |                          |                    |       |                          |                     |
| 1995-1999                 | 5                 |             |             | 17  | <b>76·5</b> | 57·0 - 96·0 | 10  | <b>50·0</b> | 21·2 - 78·8  | 10    | <b>40·1</b> | 12·2 - 67·9 | 24   | <i>66·7</i>              | <i>48·4 - 85·1</i> | 18    | <i>50·0</i>              | <i>28·0 - 72·1</i>  |
| 2000-2004                 | 5                 |             |             | 16  | <b>62·5</b> | 39·7 - 85·3 | 10  | <b>70·0</b> | 43·3 - 96·7  | 6     |             |             | 20   | <i>75·1</i>              | <i>56·6 - 93·5</i> | 17    | <i>58·8</i>              | <i>36·4 - 81·3</i>  |
| 2005-2009                 | 7                 |             |             | 11  | <b>73·4</b> | 48·8 - 98·0 | 5   |             |              | 6     |             |             | 18   | <i>74·9</i>              | <i>53·9 - 95·8</i> | 11    | <i>58·2</i>              | <i>32·4 - 84·1</i>  |
| <b>Poland (Wroclaw)</b>   |                   |             |             |     |             |             |     |             |              |       |             |             |      |                          |                    |       |                          |                     |
| 2000-2004                 |                   |             |             | 3   |             |             | 4   |             |              | 1     |             |             | 2    |                          |                    | 6     |                          |                     |
| 2005-2009                 | 2                 |             |             | 6   |             |             | 4   |             |              | 4     |             |             | 7    |                          |                    | 9     |                          |                     |
| <b>Portugal *</b>         |                   |             |             |     |             |             |     |             |              |       |             |             |      |                          |                    |       |                          |                     |
| 1998-1999                 |                   |             |             | 5   |             |             | 6   |             |              | 6     |             |             | 9    |                          |                    | 8     |                          |                     |
| 2000-2004                 | 2                 |             |             | 18  | <b>50·0</b> | 27·9 - 72·2 | 24  | <b>62·6</b> | 43·7 - 81·4  | 21    | <b>52·4</b> | 31·8 - 73·1 | 33   | <i>60·7</i>              | <i>44·3 - 77·0</i> | 32    | <b>47·0</b> <sup>R</sup> | 33·7 - 60·3         |
| 2005-2009                 | 1                 |             |             | 15  | <b>48·1</b> | 25·9 - 70·3 | 15  | <b>66·8</b> | 45·7 - 87·9  | 21    | <b>67·3</b> | 48·0 - 86·6 | 26   | <i>58·1</i>              | <i>40·5 - 75·6</i> | 26    | <i>63·0</i>              | <i>46·1 - 79·9</i>  |
| <b>Slovakia *</b>         |                   |             |             |     |             |             |     |             |              |       |             |             |      |                          |                    |       |                          |                     |
| 2000-2004                 | 1                 |             |             | 11  | <b>27·3</b> | 3·6 - 51·0  | 10  | <b>40·0</b> | 12·2 - 67·9  | 13    | <b>61·6</b> | 36·4 - 86·7 | 12   | <i>33·4</i>              | <i>8·8 - 58·0</i>  | 23    | <i>52·2</i>              | <i>32·4 - 72·0</i>  |
| 2005-2007                 | 6                 |             |             | 7   |             |             | 5   |             |              | 6     |             |             | 15   | <i>52·9</i>              | <i>21·5 - 84·3</i> | 9     |                          |                     |
| <b>Slovenia *</b>         |                   |             |             |     |             |             |     |             |              |       |             |             |      |                          |                    |       |                          |                     |
| 1995-1999                 |                   |             |             | 1   |             |             | 3   |             |              | 3     |             |             | 4    |                          |                    | 3     |                          |                     |
| 2000-2004                 | 1                 |             |             | 4   |             |             | 1   |             |              | 5     |             |             | 7    |                          |                    | 4     |                          |                     |
| 2005-2009                 | 2                 |             |             | 6   |             |             | 4   |             |              | 3     |             |             | 3    |                          |                    | 12    | <i>81·6</i>              | <i>59·4 - 100·0</i> |
| <b>Spanish registries</b> |                   |             |             |     |             |             |     |             |              |       |             |             |      |                          |                    |       |                          |                     |
| 1995-1999                 | 8                 |             |             | 15  | <b>40·0</b> | 16·6 - 63·5 | 4   |             |              | 11    | <b>45·5</b> | 18·1 - 72·9 | 16   | <i>50·1</i>              | <i>26·7 - 73·5</i> | 22    | <i>45·5</i>              | <i>25·4 - 65·7</i>  |
| 2000-2004                 | 5                 |             |             | 13  | <b>53·9</b> | 28·2 - 79·5 | 11  | <b>81·8</b> | 60·2 - 100·0 | 10    | <b>60·1</b> | 31·6 - 88·5 | 22   | <i>50·1</i>              | <i>29·8 - 70·3</i> | 17    | <i>76·5</i>              | <i>57·0 - 96·0</i>  |
| 2005-2009                 | 4                 |             |             | 14  | <b>58·8</b> | 36·5 - 81·2 | 10  | <b>55·7</b> | 28·5 - 82·9  | 18    | <b>68·3</b> | 47·9 - 88·6 | 31   | <b>60·4</b> <sup>R</sup> | 48·0 - 72·7        | 15    | <i>58·1</i>              | <i>35·5 - 80·7</i>  |

Web-table 3: Acute myeloid leukaemia (ICCC3 Ib) - Five-year net survival (NS, %) by age group and sex: continent, country and calendar period of diagnosis

| Calendar              | Age group (years) |             |             |     |             |             |     |             |             |       |             |             | Sex  |                          |             |       |             |              |
|-----------------------|-------------------|-------------|-------------|-----|-------------|-------------|-----|-------------|-------------|-------|-------------|-------------|------|--------------------------|-------------|-------|-------------|--------------|
|                       | <1                |             |             | 1-4 |             |             | 5-9 |             |             | 10-14 |             |             | Boys |                          |             | Girls |             |              |
|                       | N                 | NS %        | 95% CI      | N   | NS %        | 95% CI      | N   | NS %        | 95% CI      | N     | NS %        | 95% CI      | N    | NS %                     | 95% CI      | N     | NS %        | 95% CI       |
| Sweden *              |                   |             |             |     |             |             |     |             |             |       |             |             |      |                          |             |       |             |              |
| 1995-1999             | 8                 |             |             | 23  | <b>73·9</b> | 56·4 - 91·4 | 8   |             |             | 11    | <b>72·7</b> | 47·8 - 97·7 | 20   | 75·1                     | 56·6 - 93·5 | 30    | 70·0        | 54·0 - 86·1  |
| 2000-2004             | 14                | <b>71·5</b> | 49·7 - 93·2 | 20  | <b>50·0</b> | 28·9 - 71·1 | 9   |             |             | 13    | <b>38·5</b> | 14·0 - 62·9 | 26   | 57·8                     | 39·3 - 76·2 | 30    | 60·0        | 42·9 - 77·2  |
| 2005-2009             | 6                 |             |             | 22  | <b>68·0</b> | 48·7 - 87·2 | 6   |             |             | 14    | <b>53·6</b> | 29·8 - 77·5 | 23   | 57·1                     | 38·6 - 75·7 | 25    | 75·8        | 59·2 - 92·4  |
| Switzerland *         |                   |             |             |     |             |             |     |             |             |       |             |             |      |                          |             |       |             |              |
| 1995-1999             | 5                 |             |             | 15  | <b>60·0</b> | 36·3 - 83·8 | 11  | <b>54·6</b> | 27·0 - 82·2 | 11    | <b>45·5</b> | 18·1 - 72·9 | 22   | 54·6                     | 34·5 - 74·8 | 20    | 55·1        | 34·0 - 76·1  |
| 2000-2004             | 4                 |             |             | 15  | <b>52·6</b> | 28·1 - 77·0 | 9   |             |             | 15    | <b>40·0</b> | 16·6 - 63·5 | 28   | <b>58·4</b> <sup>R</sup> | 44·5 - 72·4 | 15    | 45·8        | 21·5 - 70·0  |
| 2005-2009             | 2                 |             |             | 15  | <b>68·1</b> | 43·1 - 93·1 | 10  | <b>75·8</b> | 53·0 - 98·5 | 7     |             |             | 22   | 75·1                     | 58·1 - 92·1 | 12    | 74·1        | 50·0 - 98·2  |
| United Kingdom *      |                   |             |             |     |             |             |     |             |             |       |             |             |      |                          |             |       |             |              |
| 1995-1999             | 57                | <b>61·6</b> | 49·1 - 74·1 | 126 | <b>64·1</b> | 55·7 - 72·4 | 93  | <b>62·0</b> | 52·1 - 71·8 | 95    | <b>50·6</b> | 40·6 - 60·6 | 204  | <b>60·1</b>              | 53·2 - 66·9 | 167   | <b>56·7</b> | 48·6 - 64·8  |
| 2000-2004             | 56                | <b>57·3</b> | 44·5 - 70·2 | 119 | <b>72·3</b> | 64·3 - 80·3 | 91  | <b>66·6</b> | 56·9 - 76·3 | 124   | <b>62·7</b> | 54·2 - 71·2 | 213  | <b>66·0</b>              | 59·4 - 72·6 | 177   | <b>65·1</b> | 57·9 - 72·3  |
| 2005-2009             | 50                | <b>56·7</b> | 43·8 - 69·6 | 123 | <b>70·0</b> | 62·0 - 78·1 | 85  | <b>73·0</b> | 63·6 - 82·4 | 110   | <b>65·3</b> | 56·2 - 74·5 | 196  | <b>67·4</b>              | 60·6 - 74·2 | 172   | <b>69·4</b> | 62·4 - 76·4  |
| <b>OCEANIA</b>        |                   |             |             |     |             |             |     |             |             |       |             |             |      |                          |             |       |             |              |
| Australian registries |                   |             |             |     |             |             |     |             |             |       |             |             |      |                          |             |       |             |              |
| 1995-1999             | 14                | <b>35·8</b> | 13·1 - 58·5 | 41  | <b>48·8</b> | 33·8 - 63·8 | 41  | <b>56·1</b> | 41·2 - 71·0 | 29    | <b>58·7</b> | 41·1 - 76·2 | 61   | <b>50·9</b> <sup>R</sup> | 41·1 - 60·6 | 64    | <b>55·4</b> | 43·5 - 67·4  |
| 2000-2004             | 23                | <b>60·4</b> | 40·7 - 80·1 | 54  | <b>74·0</b> | 62·4 - 85·6 | 39  | <b>71·8</b> | 57·9 - 85·7 | 54    | <b>70·4</b> | 58·4 - 82·5 | 94   | <b>72·5</b>              | 62·7 - 82·2 | 76    | <b>69·4</b> | 59·3 - 79·6  |
| 2005-2009             | 21                | <b>76·1</b> | 58·1 - 94·1 | 47  | <b>85·5</b> | 75·6 - 95·4 | 20  | <b>59·3</b> | 41·4 - 77·2 | 41    | <b>63·2</b> | 49·1 - 77·3 | 65   | <b>74·2</b> <sup>R</sup> | 65·7 - 82·8 | 64    | <b>67·4</b> | 56·7 - 78·1  |
| New Zealand *         |                   |             |             |     |             |             |     |             |             |       |             |             |      |                          |             |       |             |              |
| 1995-1999             | 8                 |             |             | 14  | <b>78·6</b> | 58·0 - 99·3 | 11  | <b>54·6</b> | 27·0 - 82·2 | 9     |             |             | 20   | 55·1                     | 34·0 - 76·1 | 22    | 81·9        | 66·2 - 97·6  |
| 2000-2004             | 4                 |             |             | 16  | <b>81·3</b> | 62·8 - 99·8 | 8   |             |             | 16    | <b>62·6</b> | 39·8 - 85·4 | 19   | 73·7                     | 54·5 - 93·0 | 25    | 64·1        | 45·7 - 82·5  |
| 2005-2009             | 4                 |             |             | 13  | <b>77·6</b> | 56·2 - 99·0 | 6   |             |             | 11    | <b>75·3</b> | 52·0 - 98·5 | 15   | 64·2                     | 42·0 - 86·3 | 19    | 83·2        | 66·2 - 100·0 |
